# Supplementary material for: Large breathing effect induced by water sorption in a remarkably stable nonporous cyanide-bridged coordination polymer
Source: Royal Society of Chemistry journal article supplement (doi:10.1039/d1sc02060a), 2021-01-01
Supplement: d1sc02060a1.pdf [file d1sc02060a1.pdf]

Electronic Supplementary Information for:

## **Large breathing effect induced by water sorption in a remarkably stable nonporous cyanide-bridged coordination polymer**

Michał Magott,<sup>a,\*</sup> Bartłomiej Gawęł,<sup>b</sup> Marcin Sarewicz,<sup>c</sup> Mateusz Reczyński,<sup>a</sup> Karolina Ogorzały,<sup>a</sup>  
Wacław Makowski,<sup>a</sup> Dawid Pinkowicz<sup>a,\*</sup>

<sup>a</sup> *Faculty of Chemistry, Jagiellonian University, Gronostajowa 2, 30-387 Kraków, Poland*

<sup>b</sup> *Department of Materials Science and Engineering, Norwegian University of Science and Technology (NTNU), 7491 Trondheim, Norway*

<sup>c</sup> *Department of Molecular Biophysics, Faculty of Biochemistry, Biophysics and Biotechnology, Jagiellonian University, Gronostajowa 7, 30-387 Kraków, Poland*

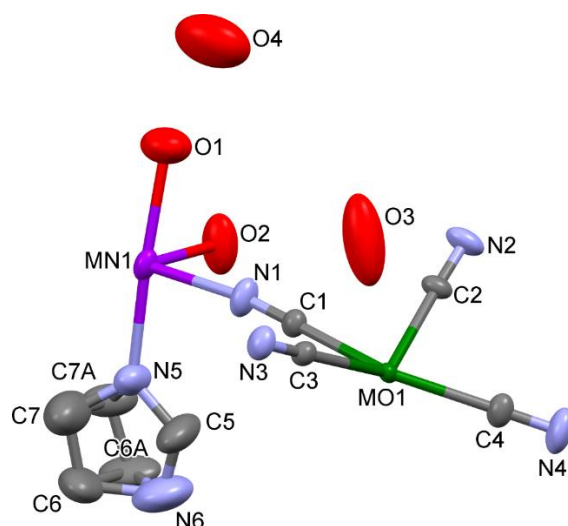

**Figure S1.** The asymmetric unit of  $1\text{Mn}\cdot 8\text{H}_2\text{O}$ . Centroids are depicted at the 50% probability level for a room temperature structure.

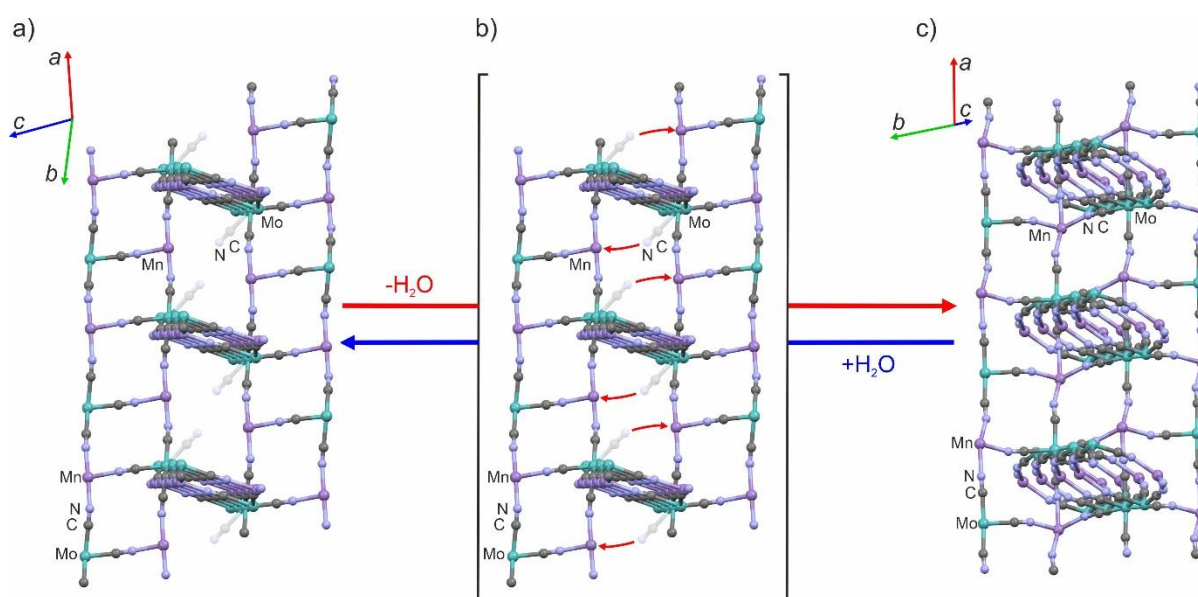

**Figure S2.** Structural diagrams similar to those in Figure 2 (main text) with colour coded atoms, showing the change of the cyanide bridging pattern in the last step of the dehydration of  $1\text{Mn}\cdot 2\text{H}_2\text{O}$  (a) accompanied by the additional CN-bridge formation (b) which finally yields anhydrous  $1\text{Mn}$  (c). The initial "crossed-ladders" CN-bridged skeleton of  $1\text{Mn}\cdot 2\text{H}_2\text{O}$  (a) transforms into a "ladders-crossing-square-grids" CN-bridged scaffold of  $1\text{Mn}$  due to the merging of one type of ladder motifs into square-grid motifs through the formation of the additional CN-bridge. See Figure 2 in the main text for a better visualization of the bridging pattern.

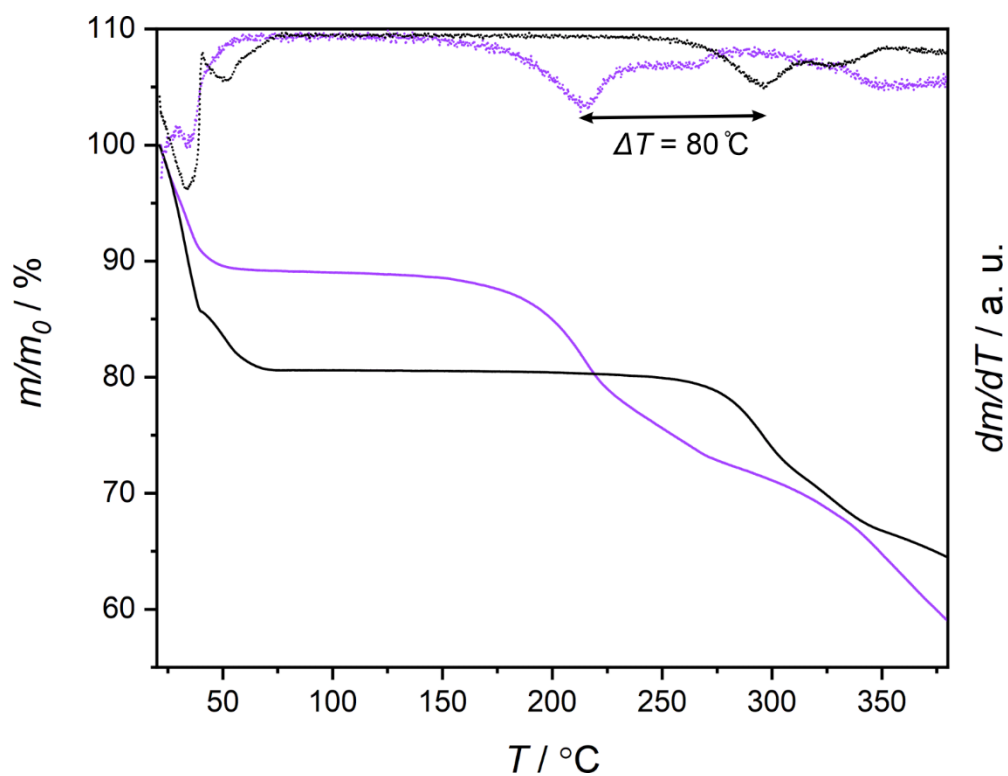

**Figure S3.** Thermogravimetric analysis for **1Mn·8H<sub>2</sub>O** (black) and **2Cd·8H<sub>2</sub>O** (purple). Solid lines denote relative mass change, while dotted lines represent its derivative in respect to temperature.

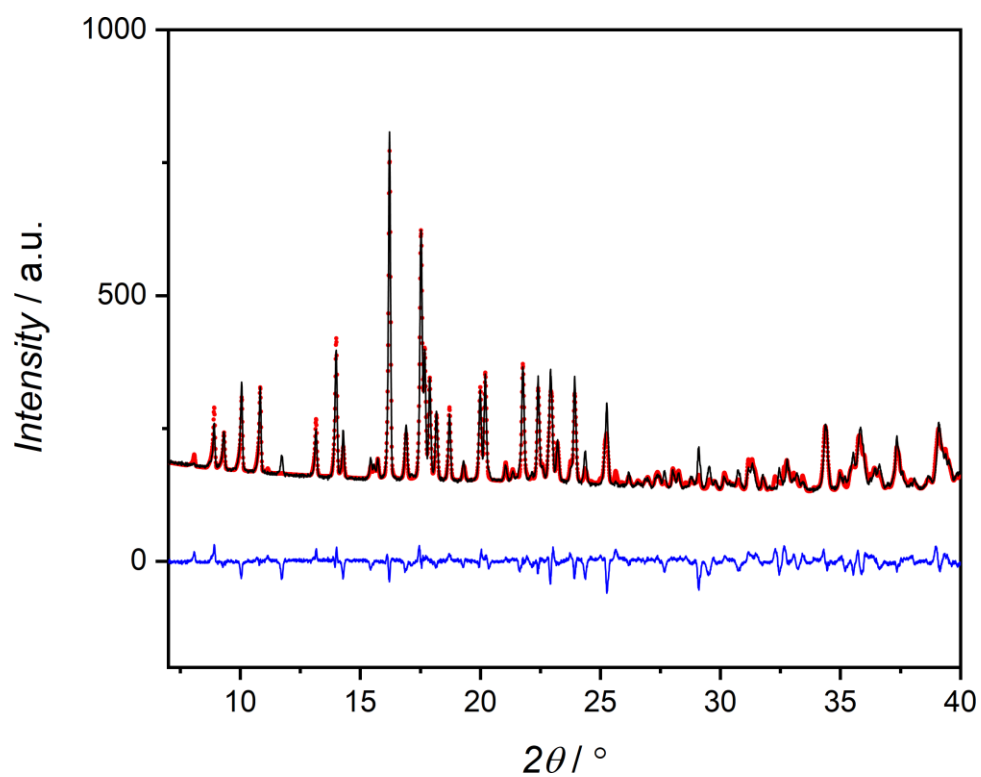

**Figure S4.** The calculated (red points) and observed (black line) PXRD patterns for **1Mn·3H<sub>2</sub>O**. The blue line presents the difference between the calculated and experimental data.

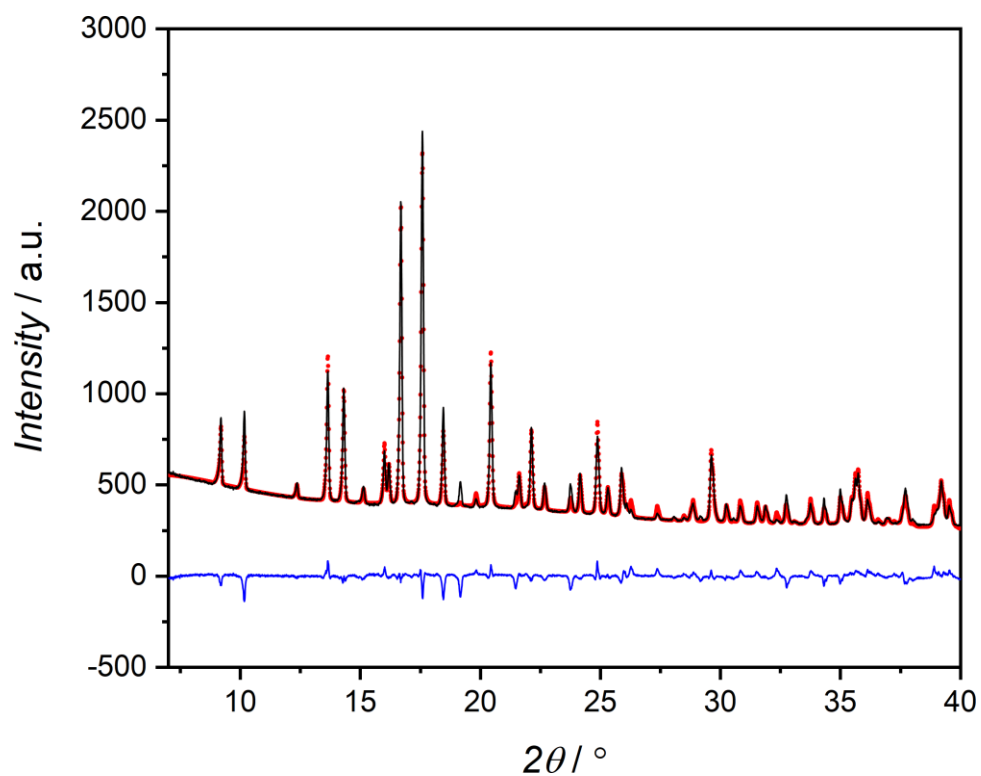

**Figure S5.** The calculated (red points) and observed (black line) PXR D patterns for  $1\text{Mn}\cdot 2\text{H}_2\text{O}$ . The blue line presents the difference between the calculated and experimental data.

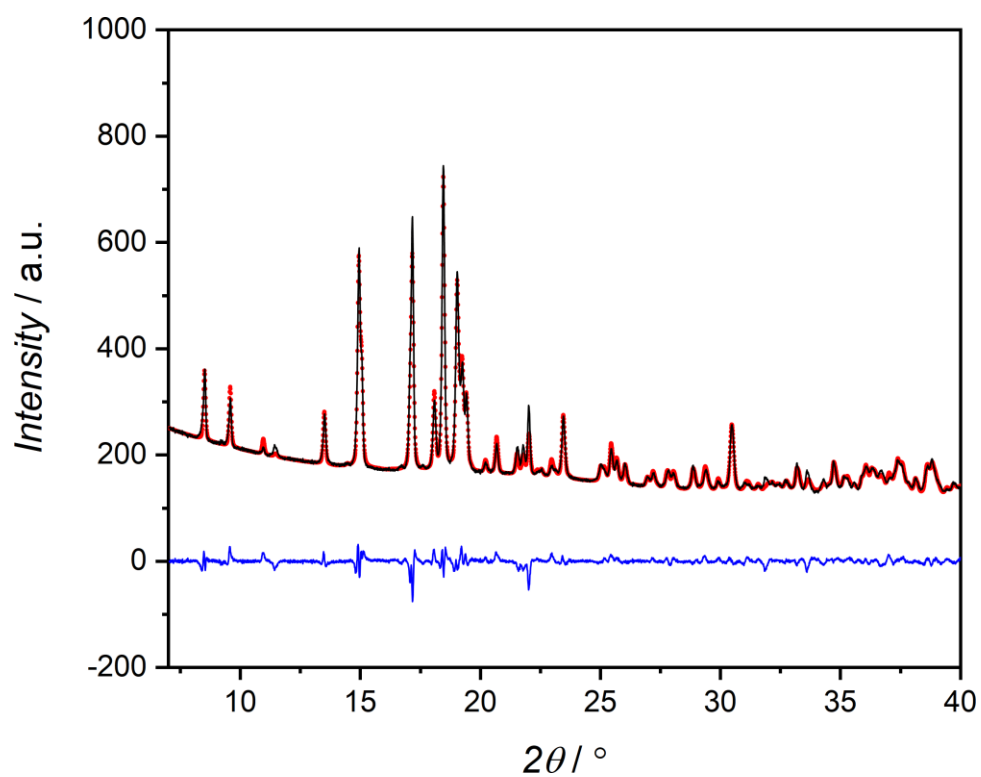

**Figure S6.** The calculated (red points) and observed (black line) PXR D patterns for  $1\text{Mn}$ . The blue line presents the difference between the calculated and experimental data.

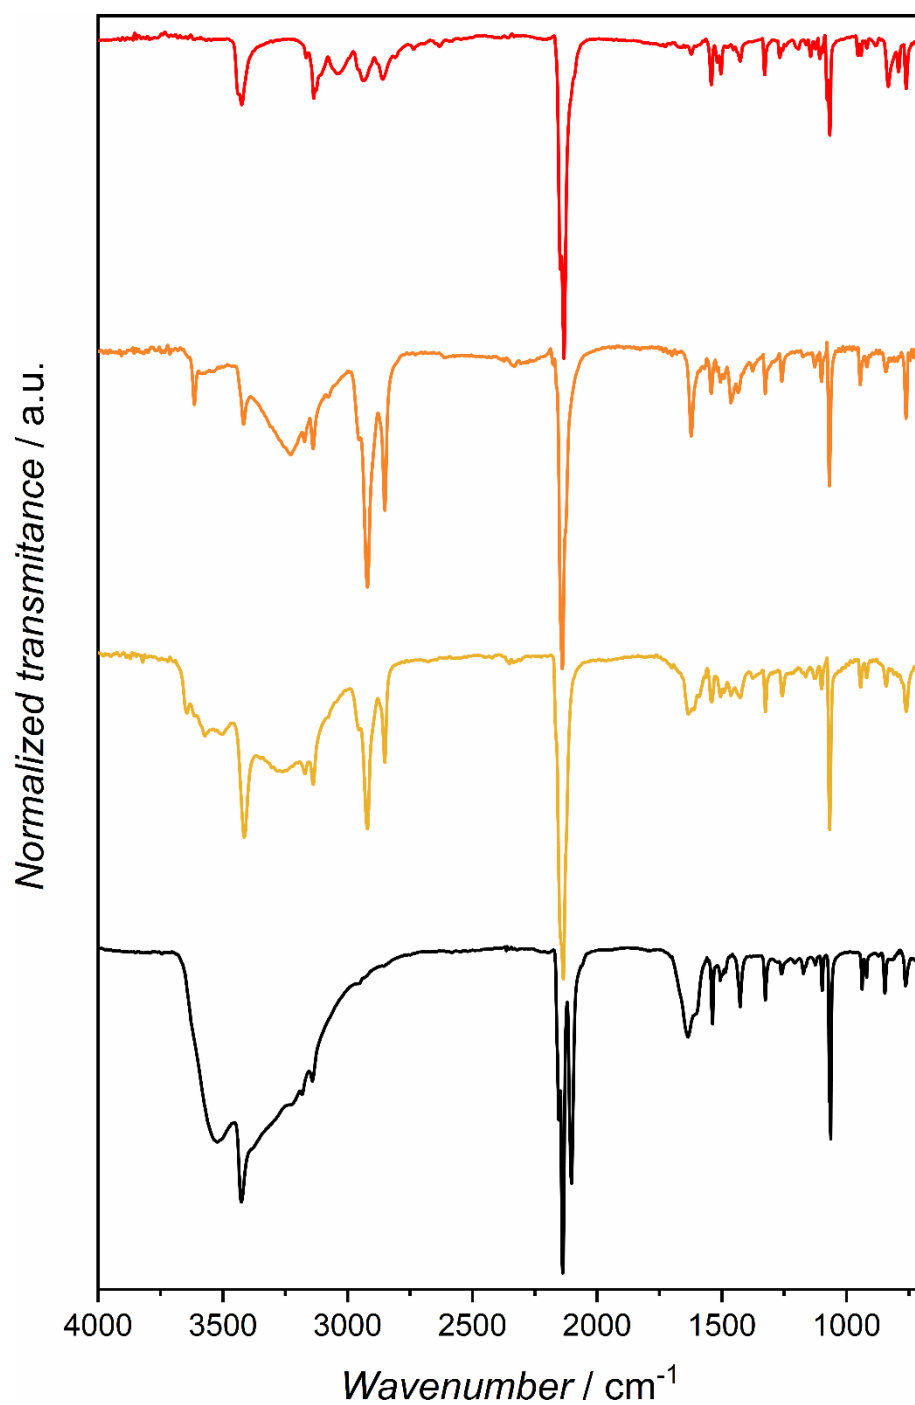

**Figure S7.** IR spectra for **1Mn·8H<sub>2</sub>O** (black), **1Mn·3H<sub>2</sub>O** (yellow), **1Mn·2H<sub>2</sub>O** (orange), and **1Mn** (red).

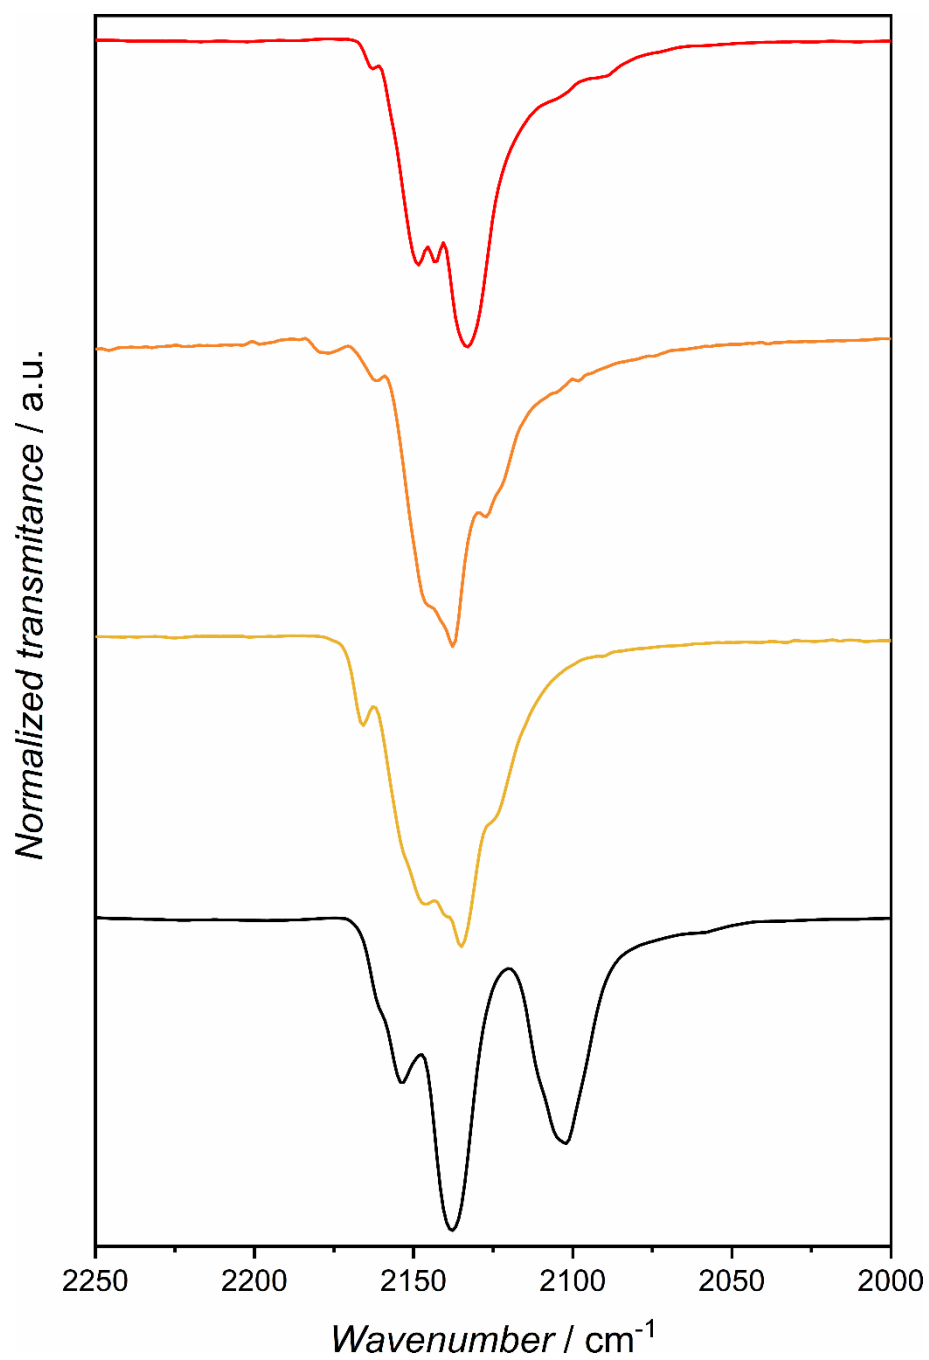

**Figure S8.** Cyanide stretching region IR spectra for **1Mn·8H<sub>2</sub>O** (black), **1Mn·3H<sub>2</sub>O** (yellow), **1Mn·2H<sub>2</sub>O** (orange), and **1Mn** (red).

### Description of the IR spectroscopy results

The most pronounced changes observed in the IR spectra depicted in Figure S7 include the disappearance of the broad O-H stretching band in the 3000-3700  $\text{cm}^{-1}$  range and the decrease in the intensity of the 1620-1640  $\text{cm}^{-1}$  O-H bending vibration upon transition from **1Mn·8H<sub>2</sub>O** to **1Mn**. The stepwise disappearance of the characteristic water vibration bands is in compliance with the quantitative measurements of water content in these phases (DVS and QE-TPDA). Apart from the O-H bending band, the fingerprint region of the spectra is dominated by the characteristic bands of imidazole ligands, which remain almost unchanged for all the phases and therefore confirm that its role as a capping ligand is largely unaffected by the water desorption. The most pronounced changes regarding the imidazole molecule is the variation of the N-H and C-H band intensity in the 2850-3600  $\text{cm}^{-1}$  range, which may be caused by the changes in hydrogen bonding and/or imidazole molecule arrangement in the crystal lattice. Significant changes are also visible in the cyanide stretching region presented in Figure S8, with distinct changes of the fine structure of the band localized at 2140  $\text{cm}^{-1}$ . Additionally, in the first step of dehydration (from **1Mn·8H<sub>2</sub>O** to **1Mn·3H<sub>2</sub>O**) the separate band at 2100  $\text{cm}^{-1}$  disappears and thus we hypothesize that this feature may originate from the hydrogen bonding between the terminal CN<sup>-</sup> ligands of the octacyanomolybdate(IV) moieties and the crystallization water molecules (as the latter are absent in all other phases). No further conclusions could be drawn from the cyanide stretching vibration region, especially the changes in the 2200-2000  $\text{cm}^{-1}$  region between **1Mn·2H<sub>2</sub>O** and **1Mn** are inconclusive regarding the formation of an additional cyanide bridge at this step.

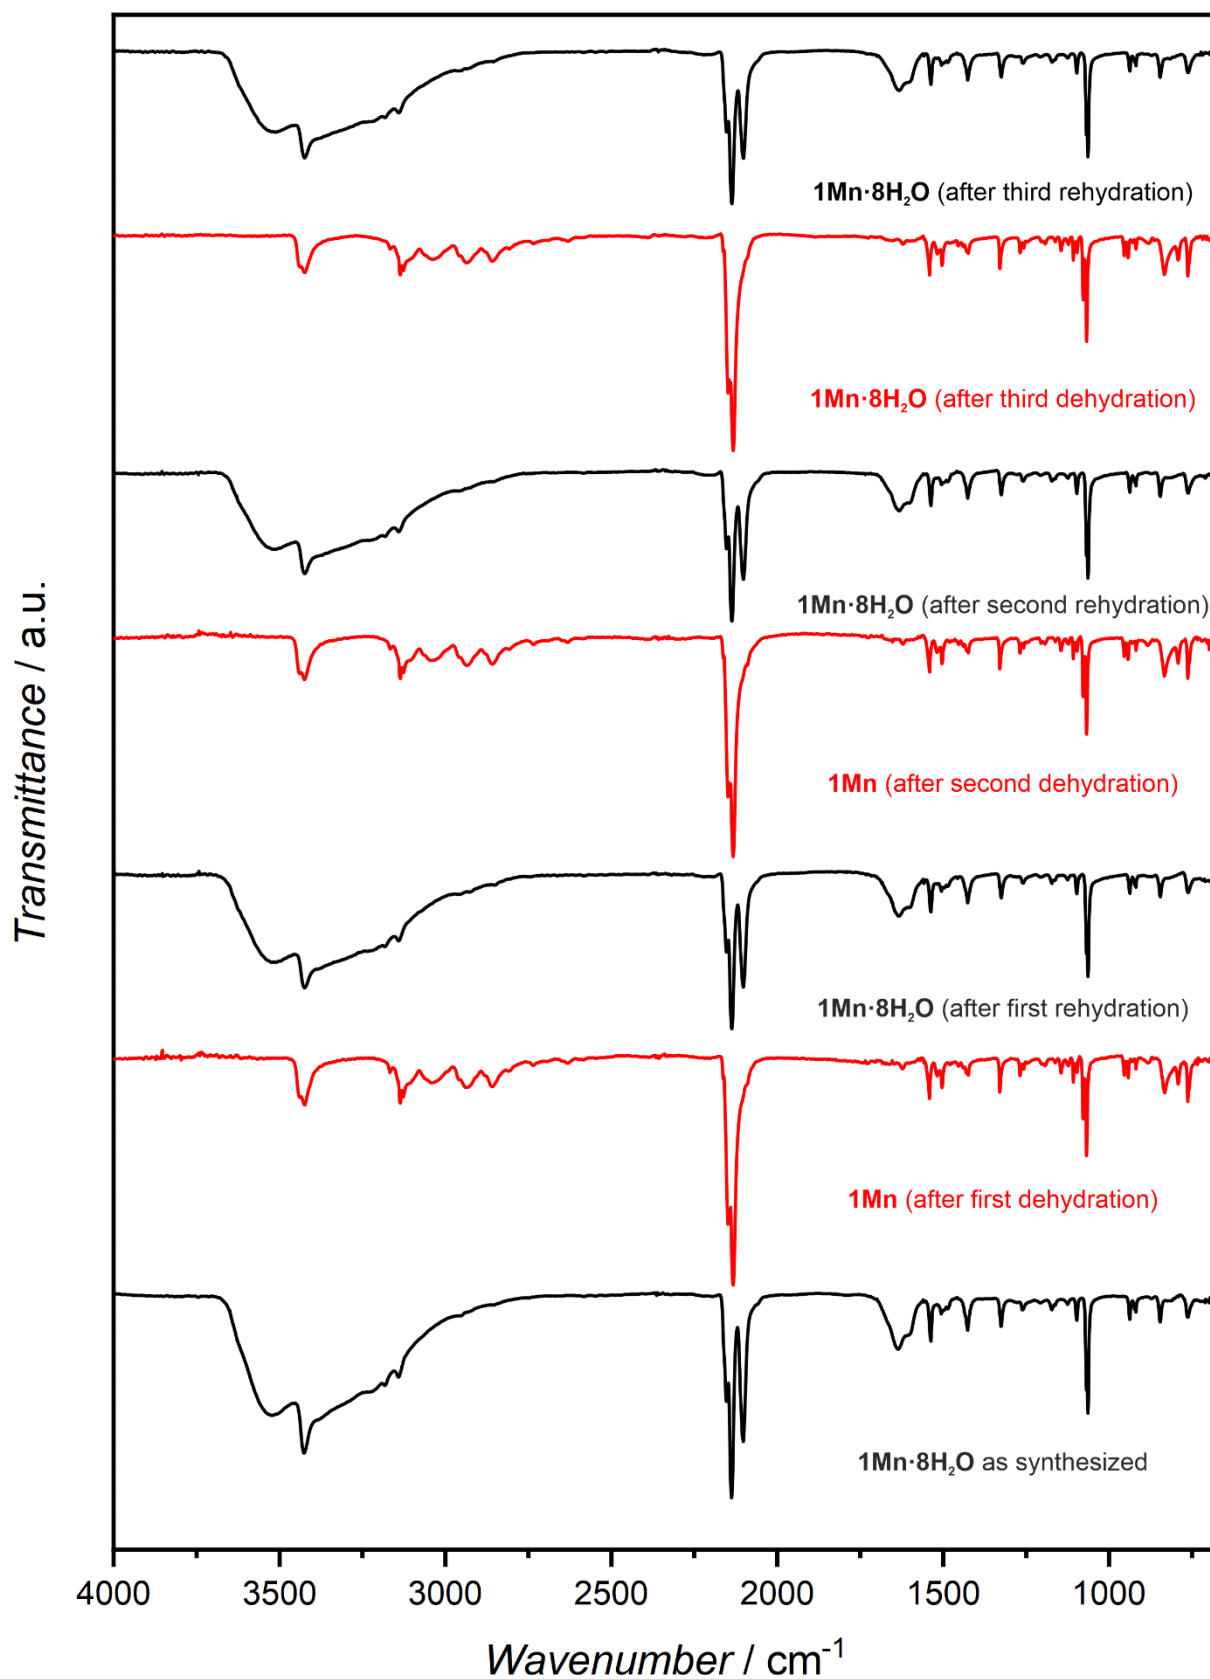

**Figure S9.** IR spectra recorded for  $1\text{Mn}\cdot 8\text{H}_2\text{O}$  during three consecutive full dehydration (red lines, 0% RH, 353 K) / rehydration cycles (black lines, >95% RH, 298 K).



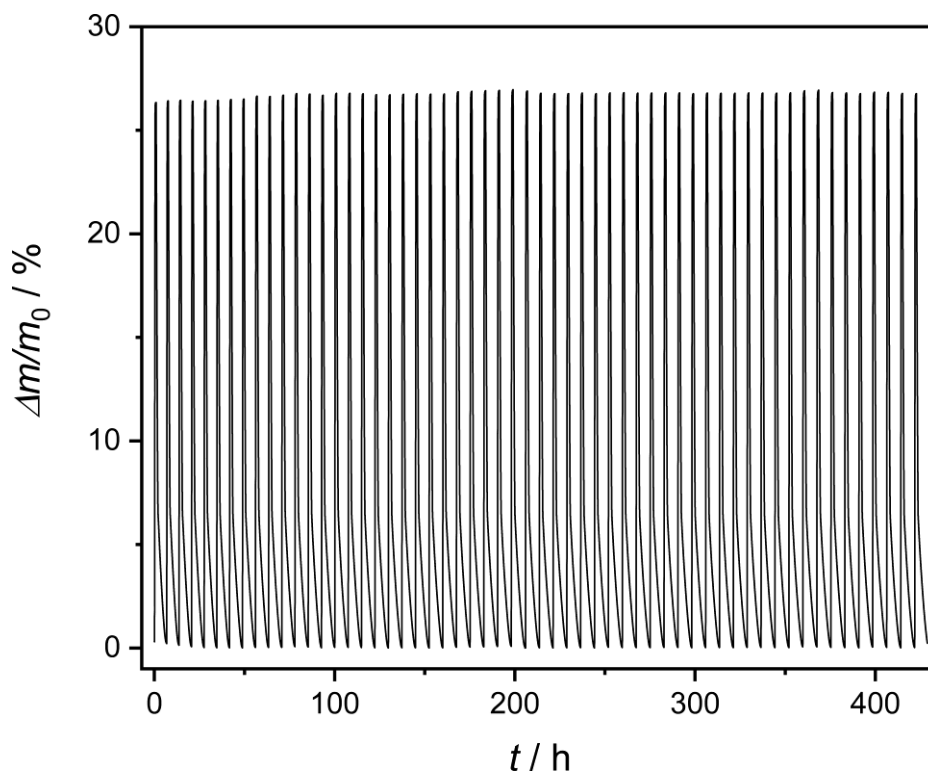

**Figure S10.** Water cycling stability test for 57 adsorption( $p/p_0 = 0.95$ )–desorption( $p/p_0 = 0$ ) cycles conducted on **1Mn** at 298 K.

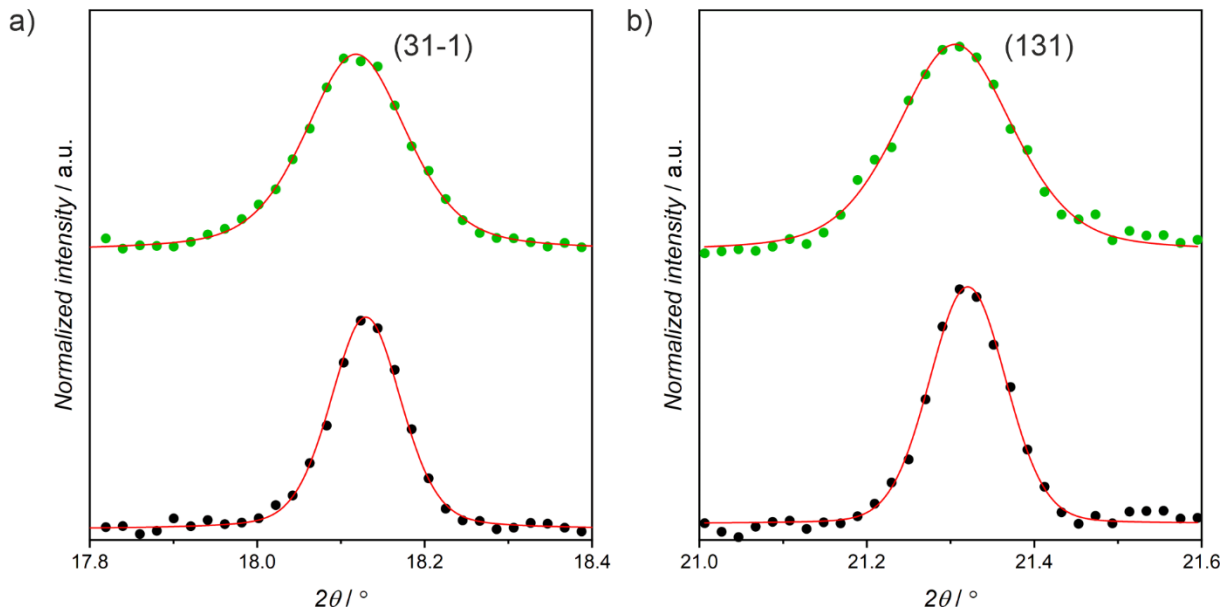

**Figure S11.** Comparison of peak broadening for **1Mn·8H<sub>2</sub>O** in the pristine state (black points) and after 58 dehydration-rehydration cycles (green points). The red line shows best fits to the pseudo-Voigt line profile  $y = y_0 + A \left[ \eta \cdot \frac{1}{\pi} \cdot \frac{\left(\frac{\Gamma}{2}\right)}{(x-x_0)^2 + \left(\frac{\Gamma}{2}\right)^2} + (1-\eta) \cdot \sqrt{\frac{\ln 2}{\pi}} \cdot \frac{2}{\Gamma} \cdot e^{-\frac{4 \ln 2 (x-x_0)^2}{\Gamma^2}} \right]$  with the following FWHM parameters: a)  $\Gamma = 0.099(2)$  (bottom) and  $\Gamma = 0.144(3)$  (top); b)  $\Gamma = 0.108(3)$  (bottom) and  $\Gamma = 0.164(6)$  (top).

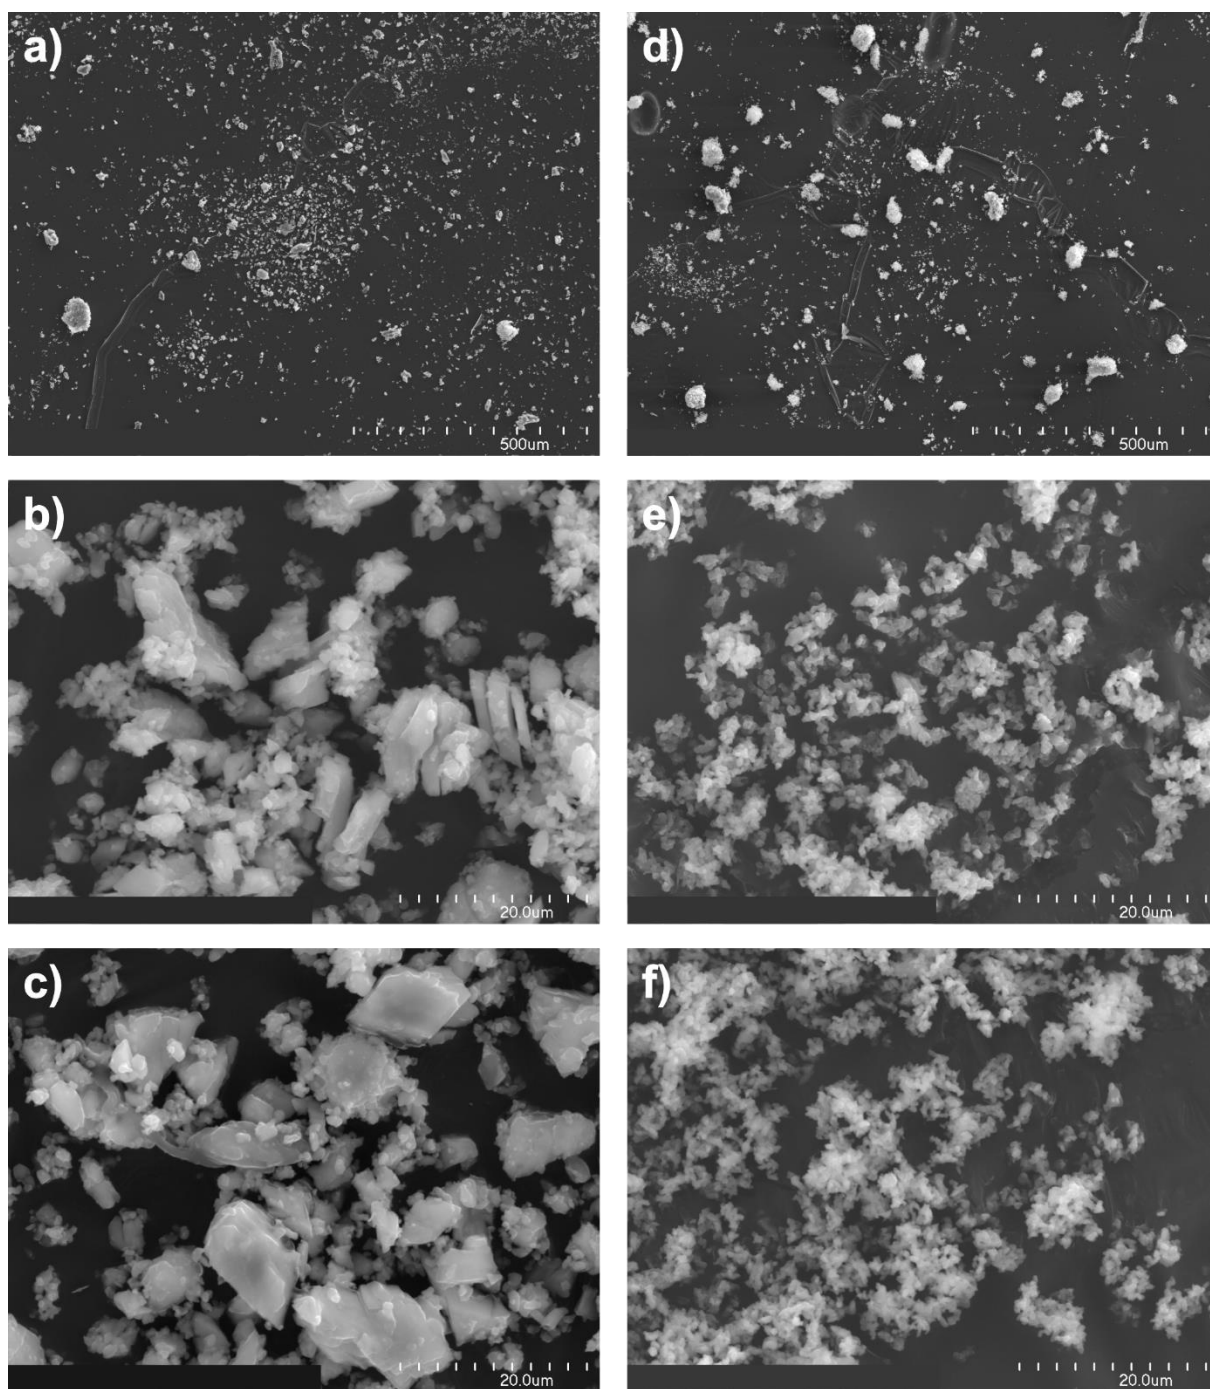

**Figure S12.** SEM pictures of  $1\text{Mn}\cdot 8\text{H}_2\text{O}$  before (a-c) and after (d-f) 58 dehydration-rehydration cycles at room temperature. Initial sample was ground in the agate mortar and dried in vacuum before SEM photographs were taken.

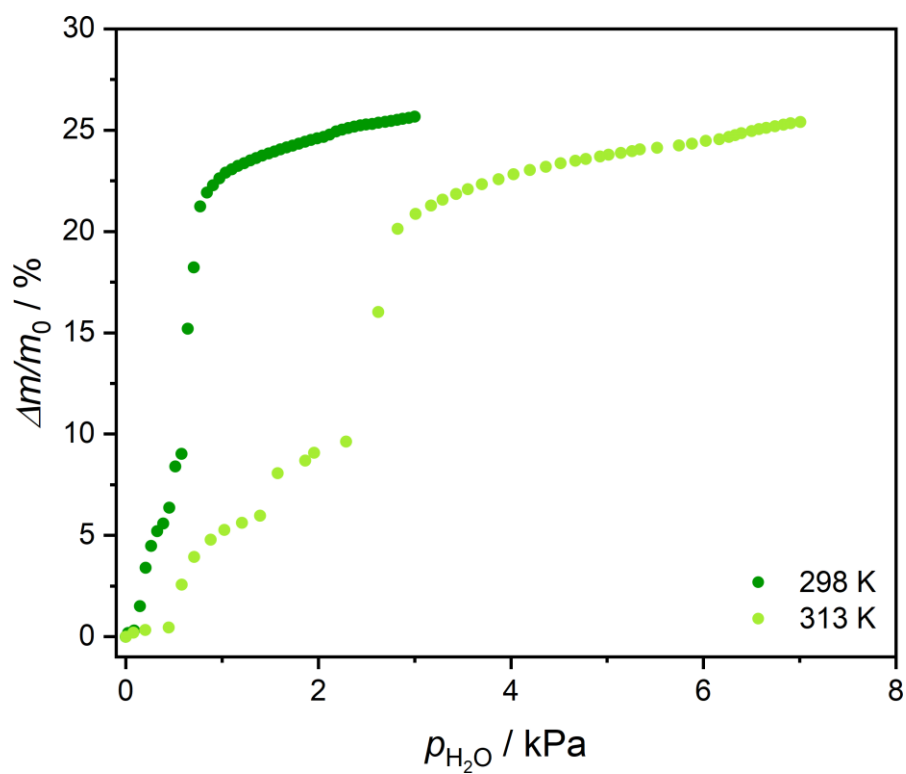

**Figure S13.** Water adsorption isotherms recorded for **1Mn** at 298 K (dark green) and 313 K (light green). X-axis presents absolute values of water vapor pressure.

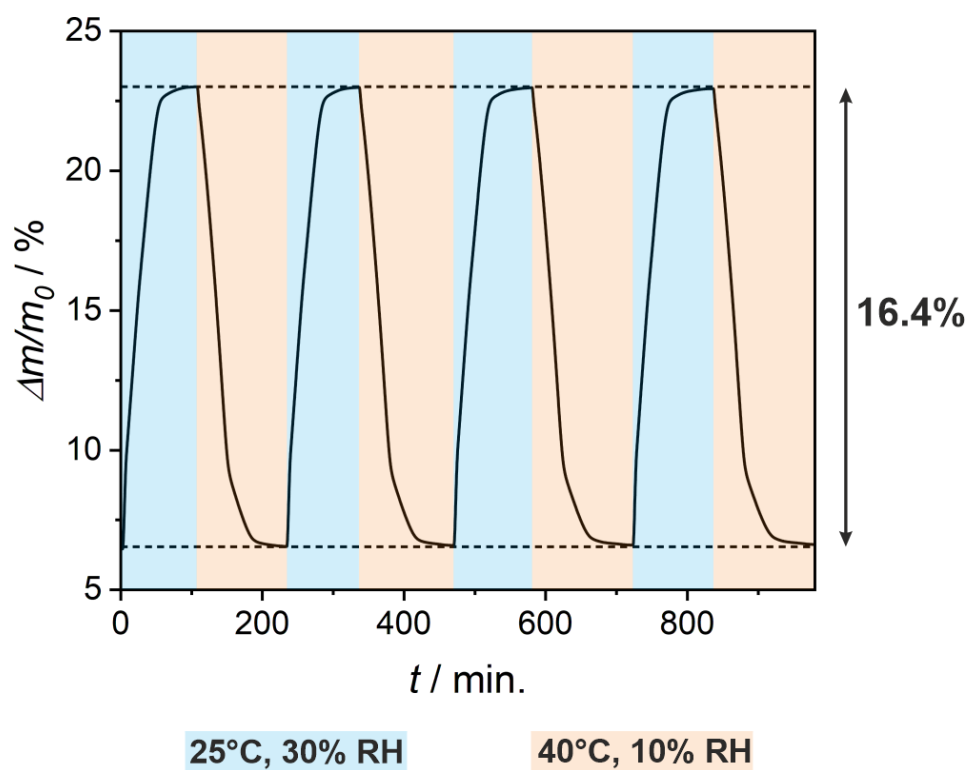

**Figure S14.** Dynamic vapor sorption measurement of **1Mn** during cycling between 25 °C (30% RH) and 40 °C (10% RH)

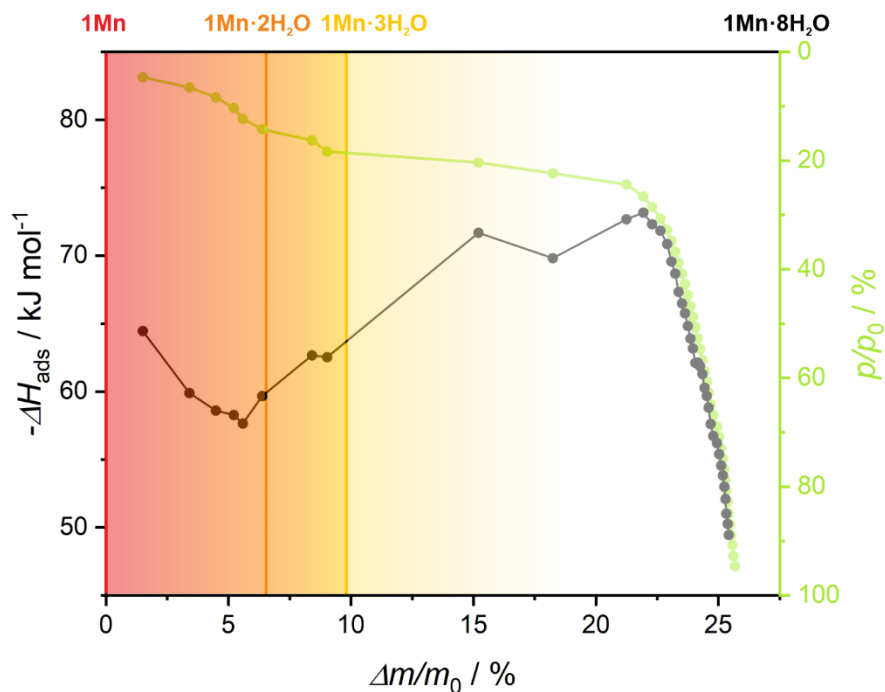

**Figure S15.** Isosteric enthalpies of water adsorption for **1Mn** calculated using the van't Hoff equation (black points) and water adsorption isotherm at 298 K (green points). Solid lines are guides for the eye.

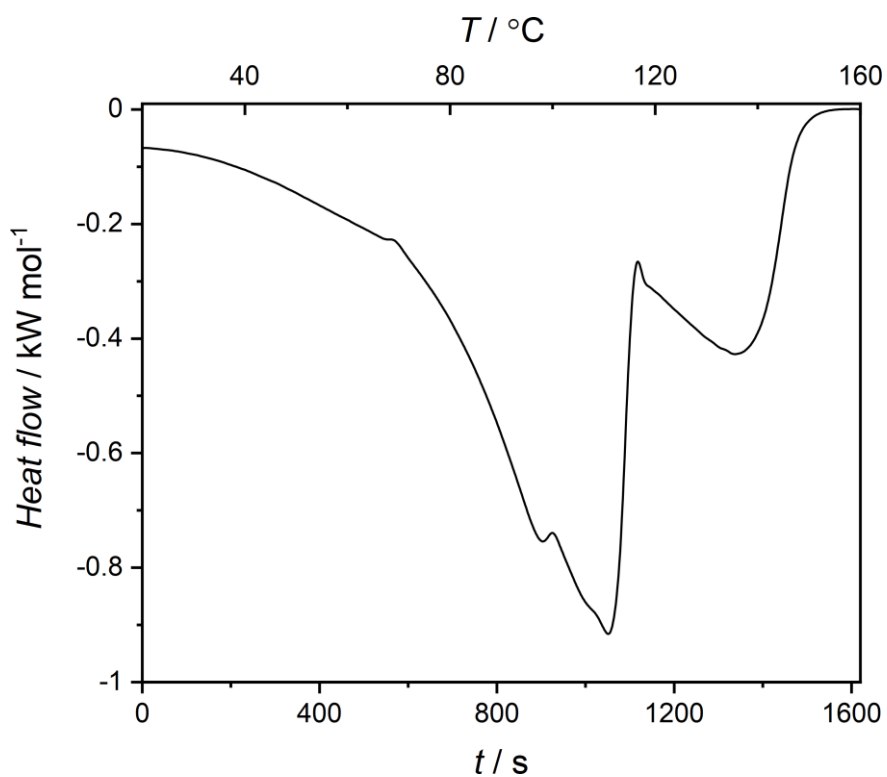

**Figure S16.** Differential scanning calorimetry (DSC) curve obtained for **1Mn·8H₂O** at the heating rate of 5 °C/min.

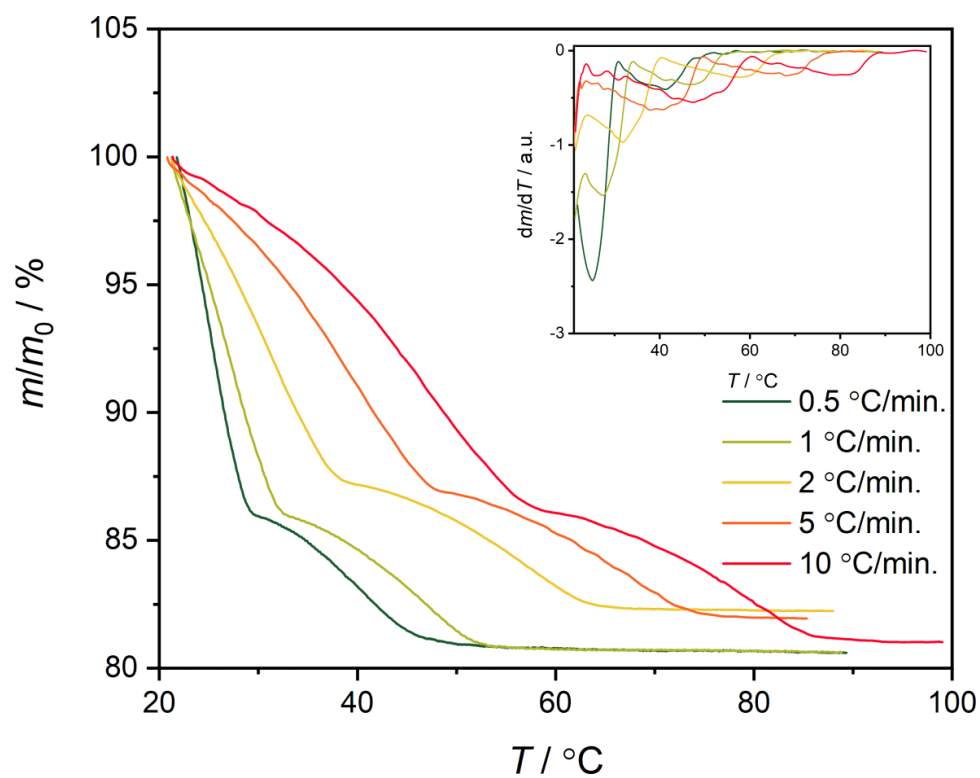

**Figure S17.** Thermogravimetric analysis for  $1\text{Mn}\cdot 8\text{H}_2\text{O}$  recorded at different heating rates. The difference in observed mass changes is the result of partial sample dehydration before measurement starts. Inset shows a numerical derivative of the data present on the main graph.

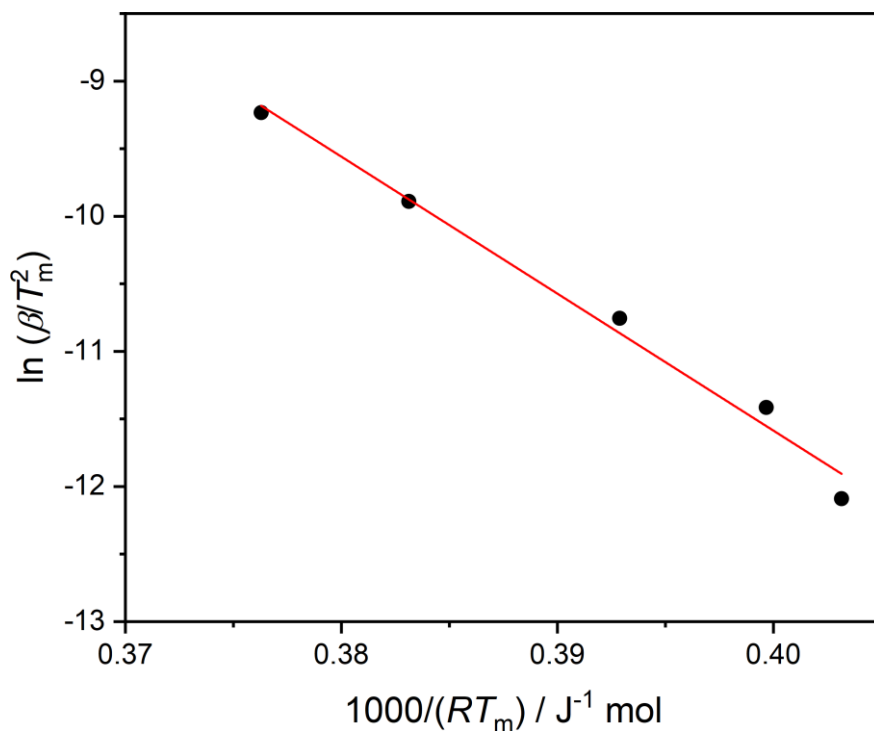

**Figure S18.** Kissinger plot for calculation of water desorption activation energy in the first step of dehydration ( $1\text{Mn}\cdot 8\text{H}_2\text{O} \rightarrow 1\text{Mn}\cdot 2\text{H}_2\text{O}$ ). Experimental points are depicted as black circles, while the red line represents the best fit ( $R^2 = 98.7\%$ ).  $B$  – heating rate,  $T_m$  – the temperature at the maximum rate of mass change ( $dm/dT$ ).

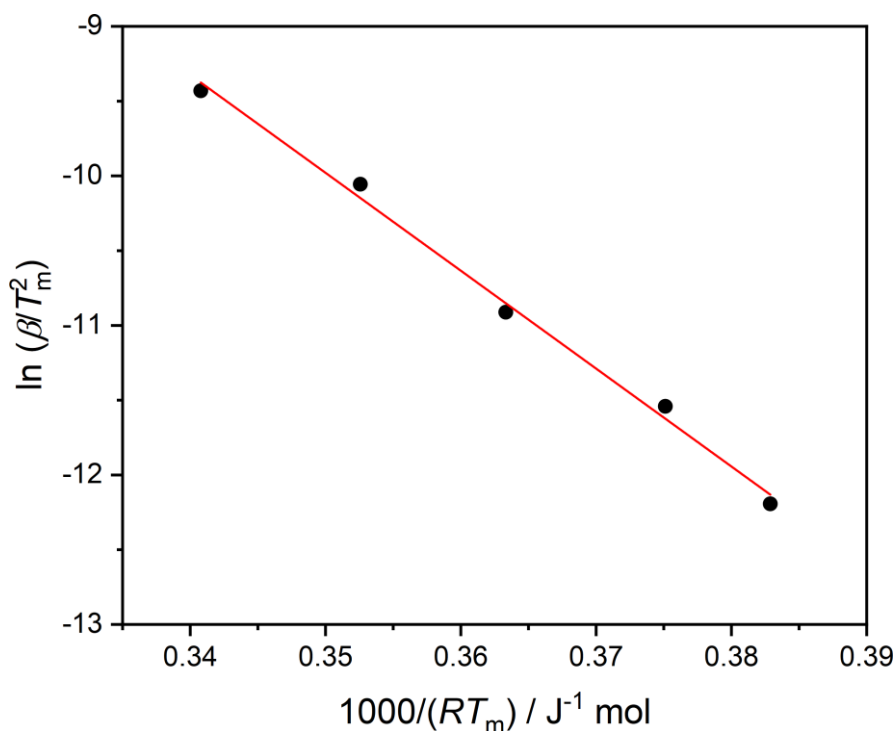

**Figure S19.** Kissinger plot for calculation of water desorption activation energy in the second step of dehydration ( $1\text{Mn}\cdot 2\text{H}_2\text{O} \rightarrow 1\text{Mn}$ ). Experimental points are depicted as black circles, while the red line represents the best fit ( $R^2 = 99.5\%$ ).  $B$  – heating rate,  $T_m$  – the temperature at the maximum rate of mass change ( $dm/dT$ ).

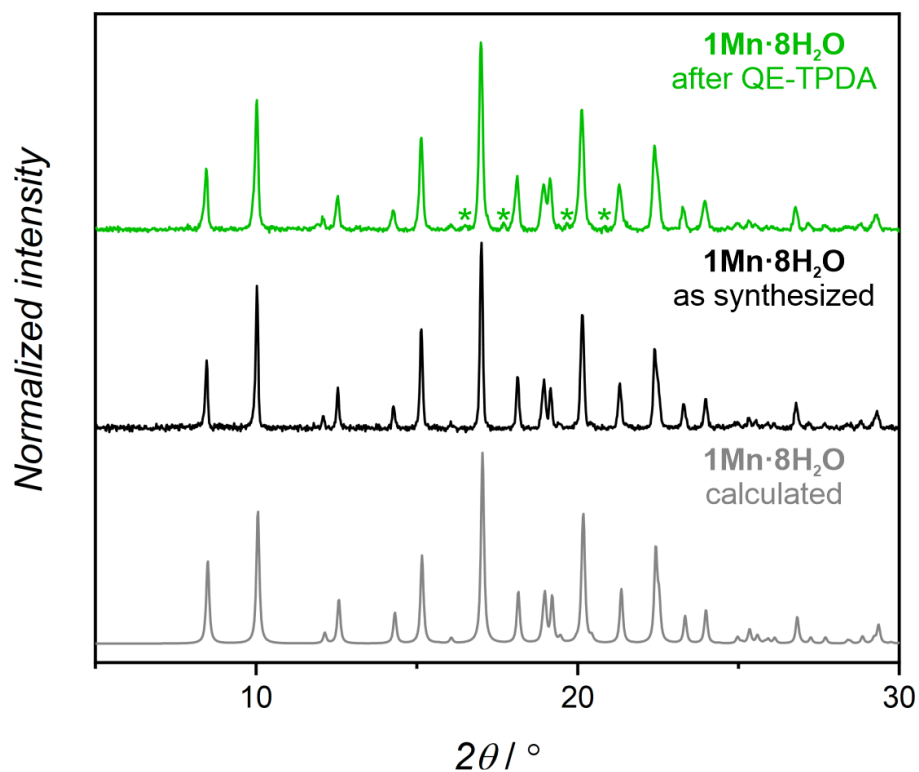

**Figure S20.** Powder X-ray diffraction patterns simulated from the single-crystal structure of **1Mn·8H<sub>2</sub>O** (bottom), obtained for a pristine sample (middle) and obtained for the sample after QE-TPDA experiment (top).

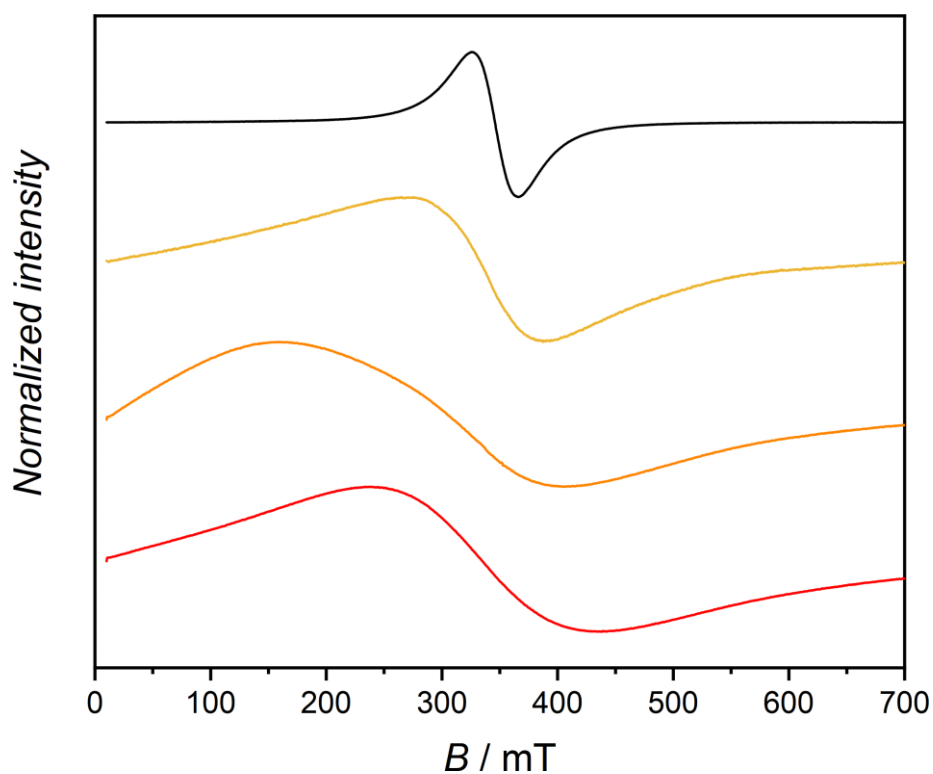

**Figure S21.** Comparison of X-band EPR spectra for **1Mn·8H<sub>2</sub>O** (black line), **1Mn·3H<sub>2</sub>O** (yellow line), **1Mn·2H<sub>2</sub>O** (orange line) and **1Mn** (red line). All spectra were recorded at room temperature and normalized to [0,1].

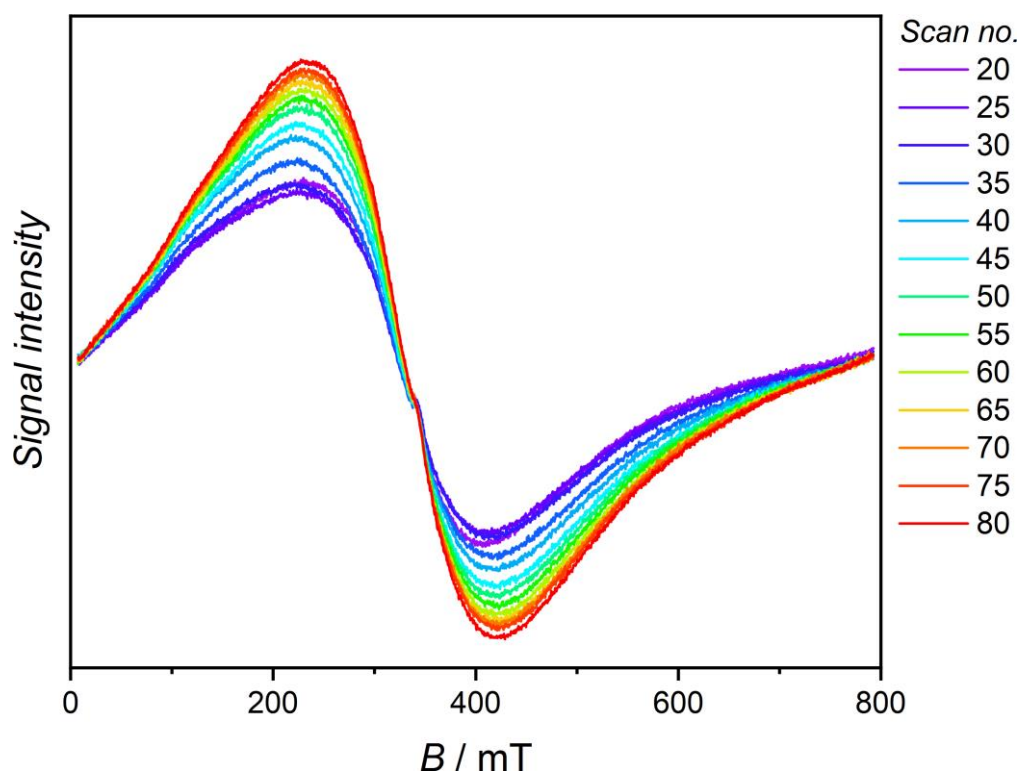

**Figure S22.** Comparison of scans 20-80 in the EPR dehydration experiment for  $1\text{Mn}\cdot 8\text{H}_2\text{O}$ , showing signal increase upon transition from  $1\text{Mn}\cdot 2\text{H}_2\text{O}$  to  $1\text{Mn}$ .

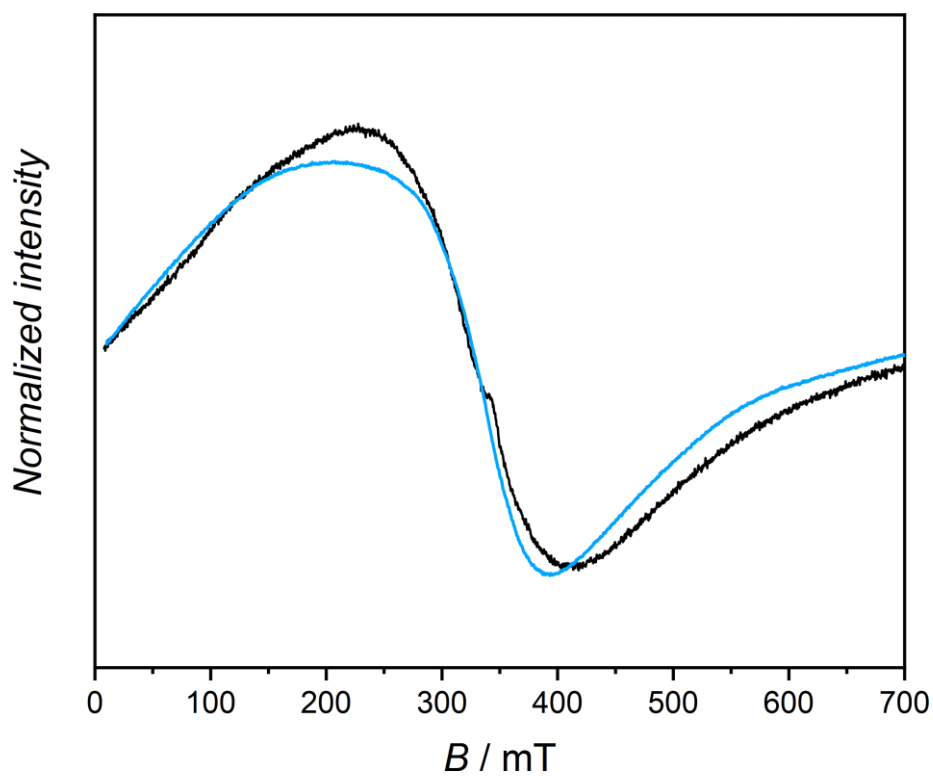

**Figure S23.** 25<sup>th</sup> scan of *in situ* EPR dehydration experiment (black line) compared with linear combination (1:1) of EPR spectra recorded for  $1\text{Mn}\cdot 3\text{H}_2\text{O}$  and  $1\text{Mn}\cdot 2\text{H}_2\text{O}$  (blue line).



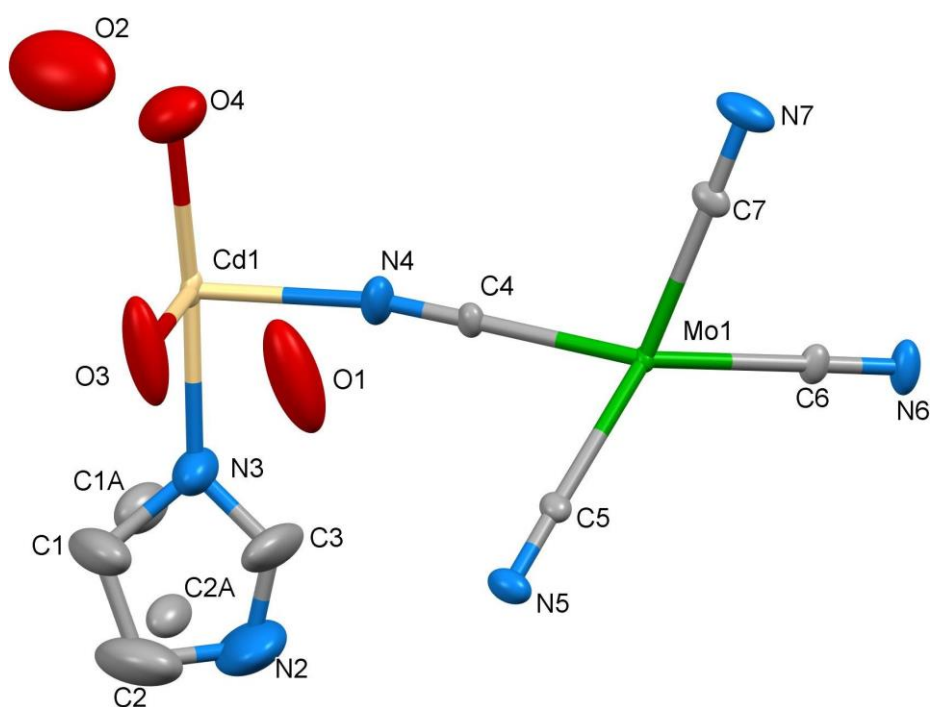

**Figure S24.** The asymmetric unit of **2Cd·8H<sub>2</sub>O**. Centroids are depicted at the 50% probability level for a structure obtained at  $T = 100$  K.

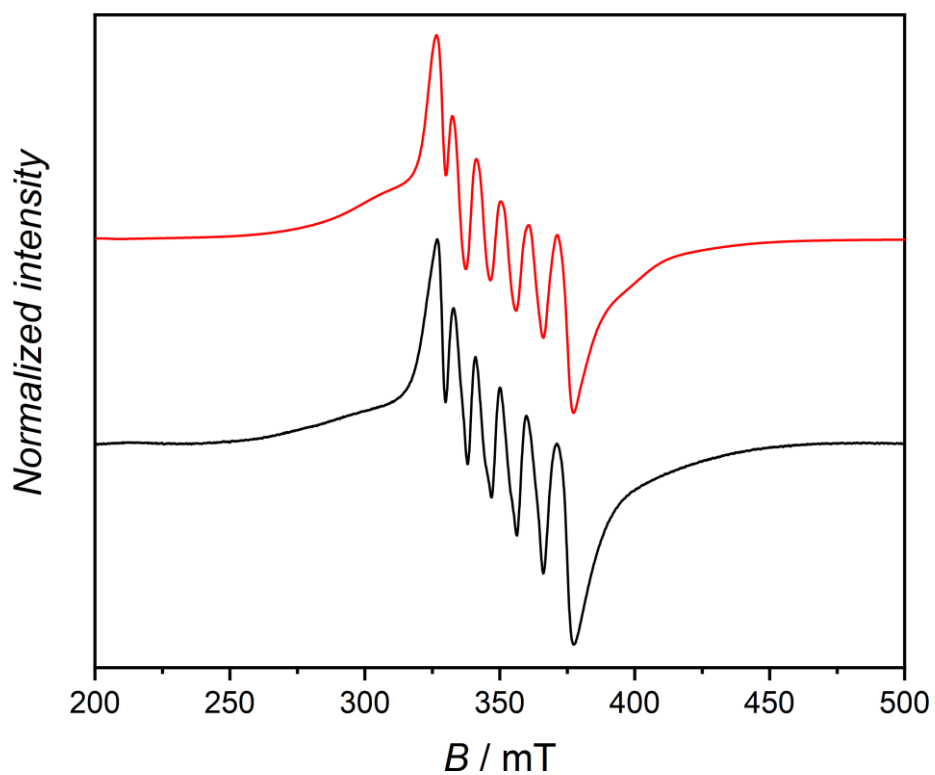

**Figure S25.** X-band (9.86 GHz) EPR spectrum of **2Cd·8H<sub>2</sub>O:Mn** recorded at room temperature (black line) and simulated for  $g = 2.00$ ,  $D = 0.02(2)$  cm<sup>-1</sup> and  $A = 260$  MHz (red line).

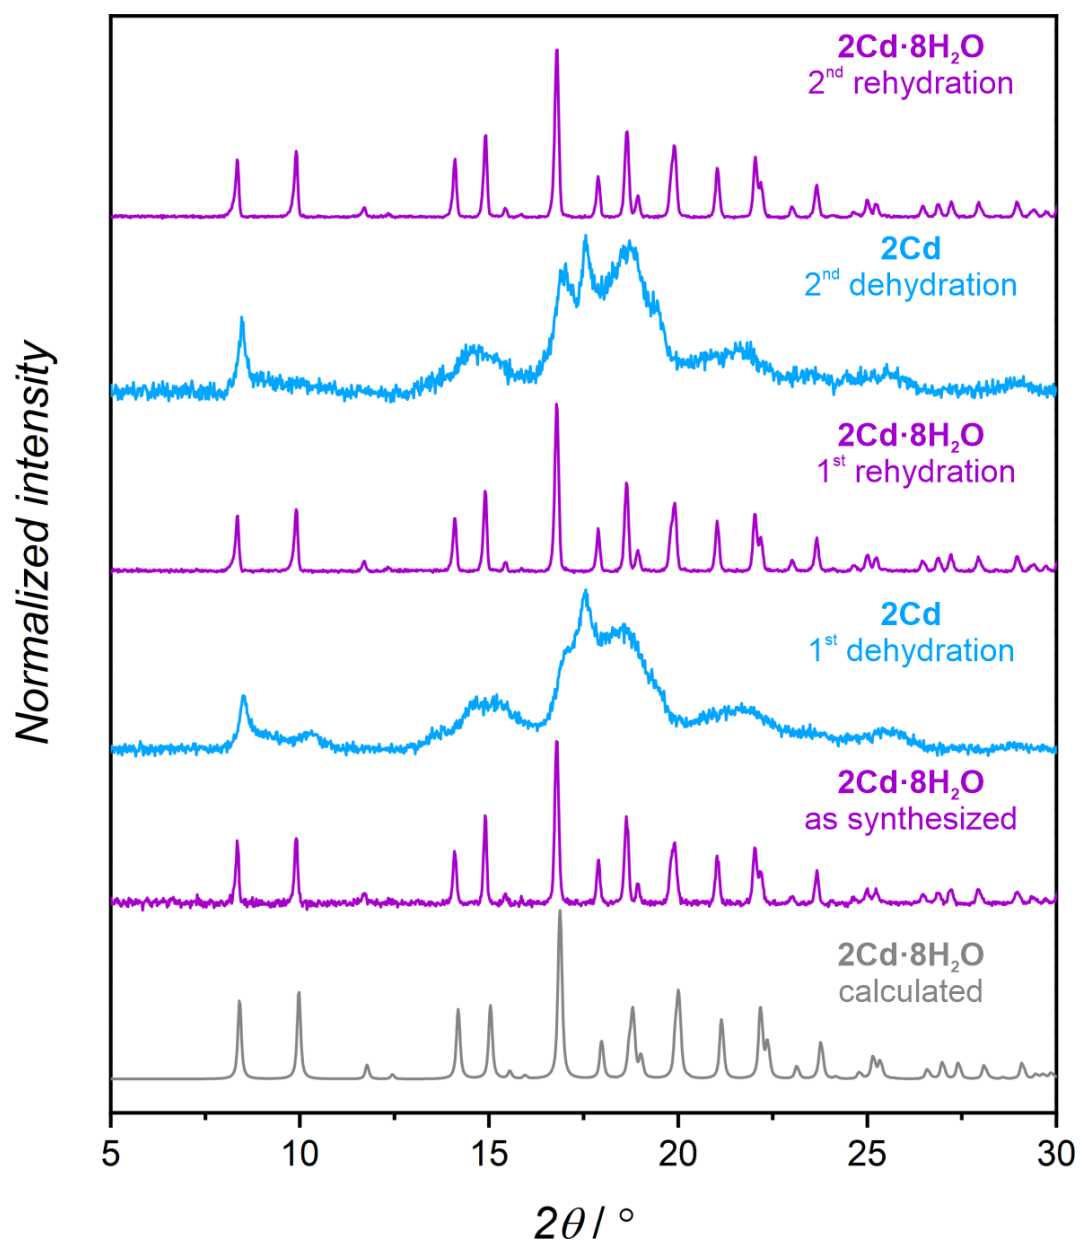

**Figure S26.** Powder X-ray diffraction patterns obtained for **2Cd·8H<sub>2</sub>O** in two dehydration-rehydration cycles at room temperature and simulated from the single-crystal structure.

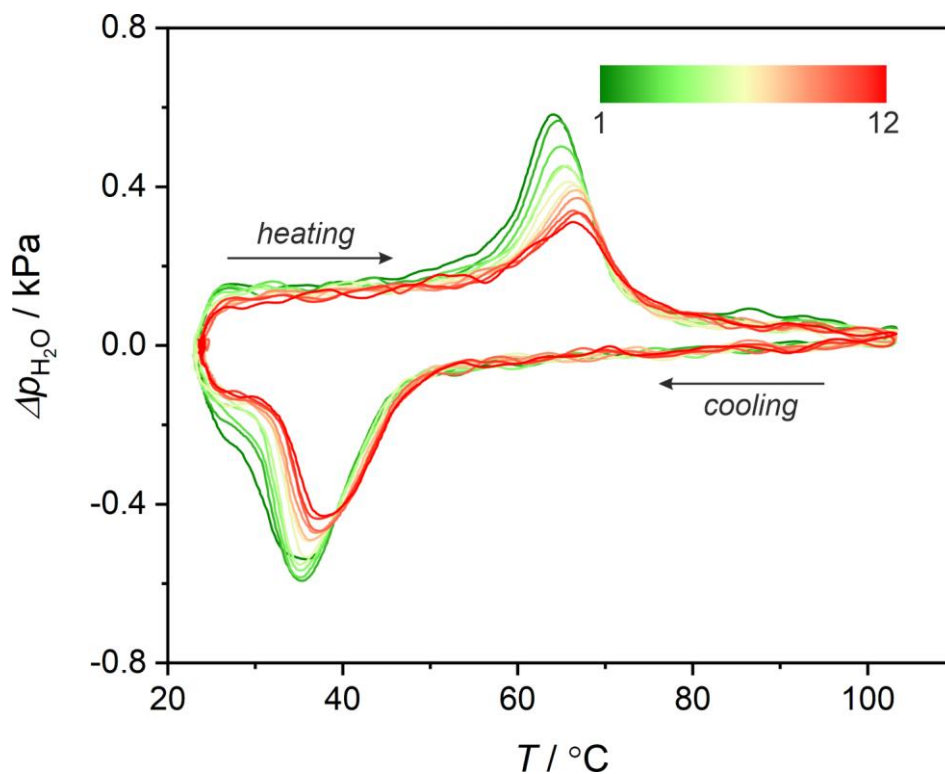

**Figure S27.** QE-TPDA profiles for  $2\text{Cd}\cdot 8\text{H}_2\text{O}$  obtained at a temperature sweep rate of  $1.5\text{ }^\circ\text{C}/\text{min}$ . using  $\text{H}_2\text{O}(2.4\text{ kPa})/\text{He}$  mixture as a carrier gas.

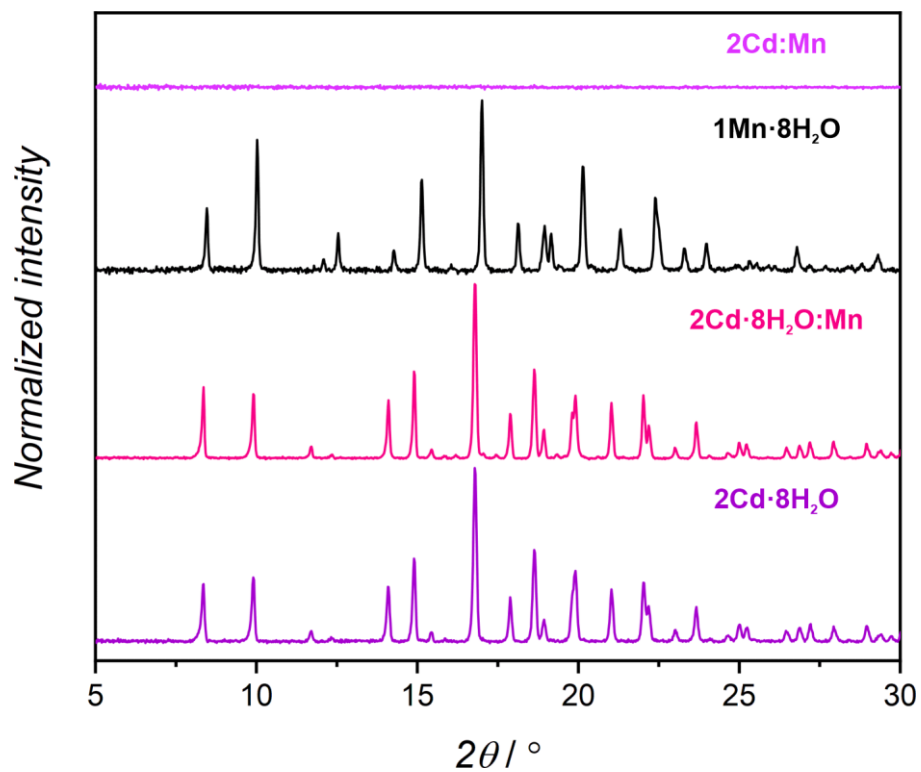

**Figure S28.** Comparison of powder X-ray diffraction patterns obtained for  $1\text{Mn}\cdot 8\text{H}_2\text{O}$ ,  $2\text{Cd}\cdot 8\text{H}_2\text{O}$ , manganese(II)-doped cadmium compound  $2\text{Cd}\cdot 8\text{H}_2\text{O}:\text{Mn}$  and its dehydrated form.

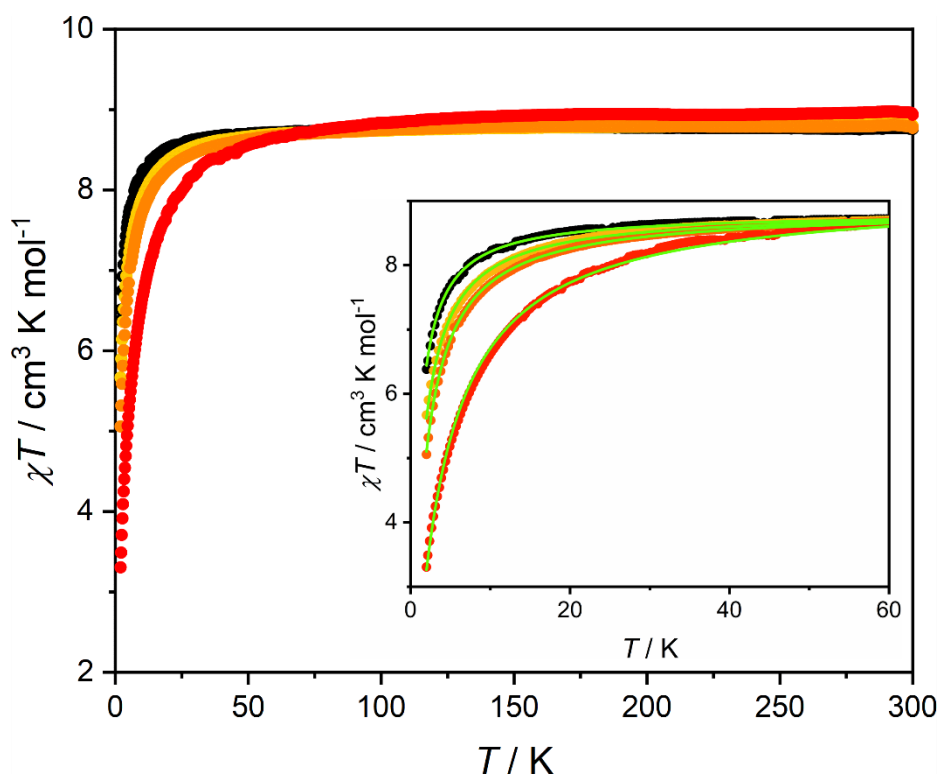

**Figure S29.**  $\chi T(T)$  curves obtained for **1Mn·8H<sub>2</sub>O** (black), **1Mn·3H<sub>2</sub>O** (yellow), **1Mn·2H<sub>2</sub>O** (orange) and **1Mn** (red) under  $H_{DC} = 0.1$  T. Inset shows a close-up of 0-60 K range and Curie-Weiss fits (solid green lines).

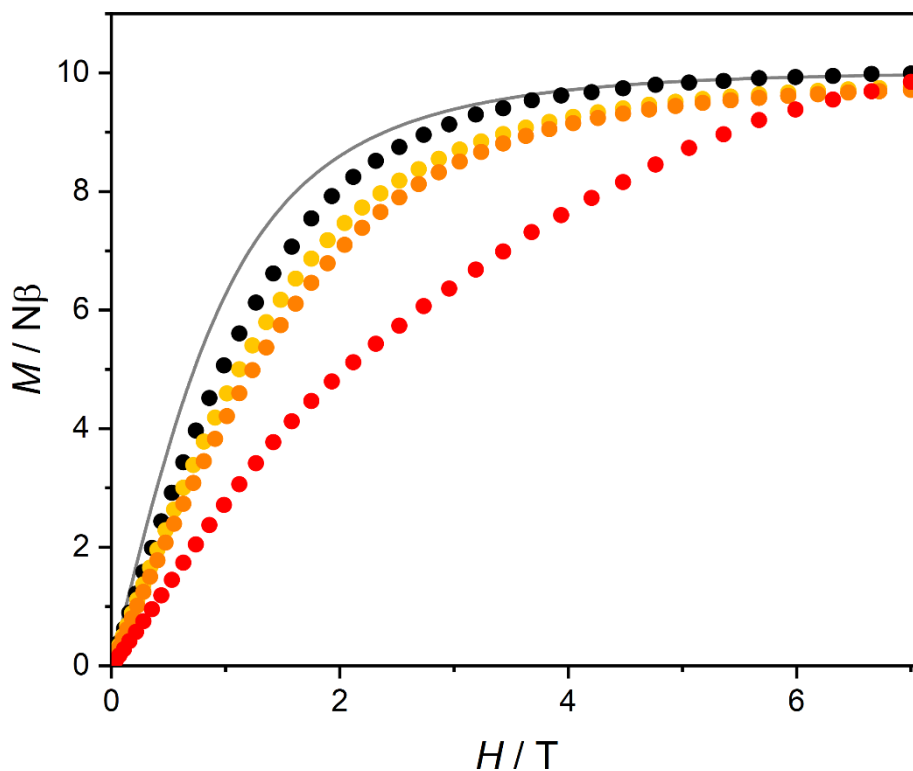

**Figure S30.**  $M(H)$  curves obtained for **1Mn·8H<sub>2</sub>O** (black), **1Mn·3H<sub>2</sub>O** (yellow), **1Mn·2H<sub>2</sub>O** (orange) and **1Mn** (red) at  $T = 2$  K. Solid grey line shows the Brillouin function for two isolated  $S = 5/2$  and  $g = 2.0$ .

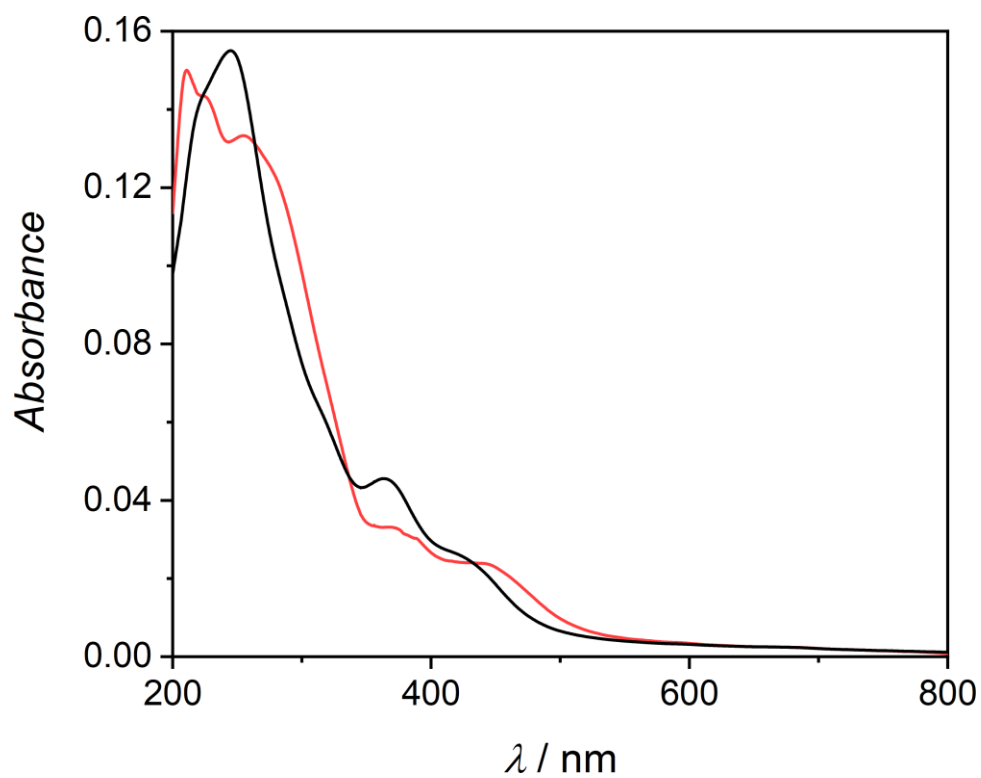

**Figure S31.** Solid state UV-Vis spectra for **1Mn·8H<sub>2</sub>O** (black) and **1Mn** (red) at room temperature.

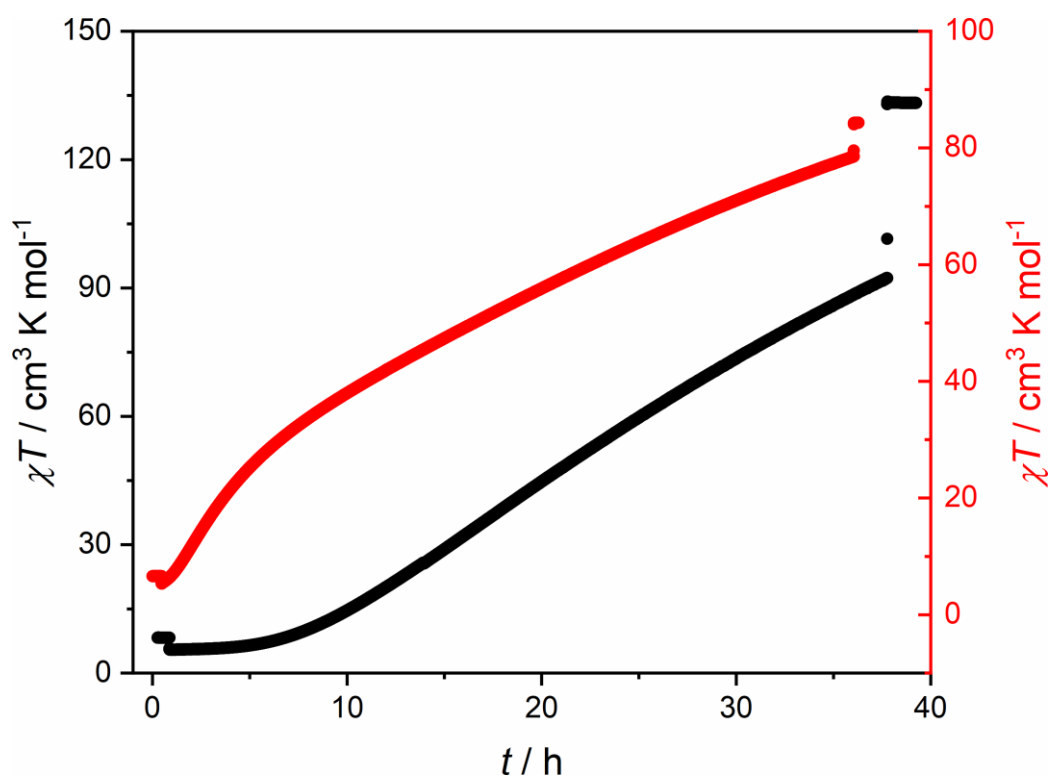

**Figure S32.**  $\chi T(t)$  curves obtained for **1Mn·8H<sub>2</sub>O** (black) and **1Mn** (red) upon 450 nm irradiation at  $T = 10$  K and  $H_{DC} = 0.1$  T.

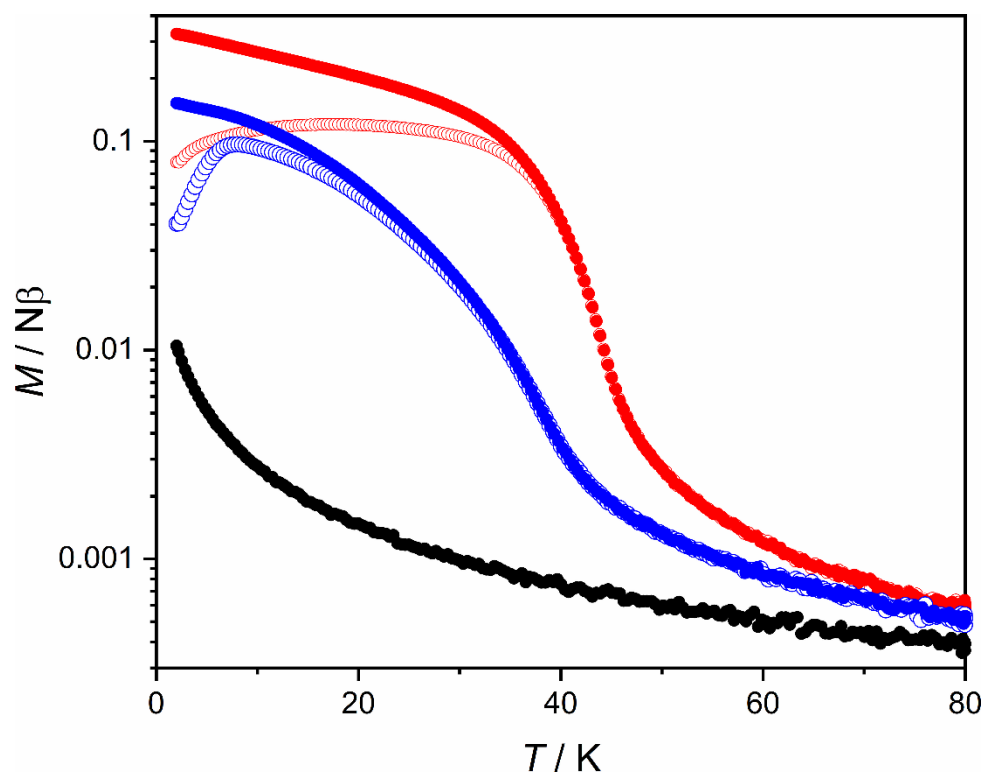

**Figure S33.** Field-cooled (closed symbols) and zero field-cooled (open symbols) curves for **1Mn·8H<sub>2</sub>O** before irradiation (black), after 405 nm irradiation at 10 K (red) and after 2 hours of thermal relaxation at 240 K (blue);  $H_{DC} = 0.02$  T.

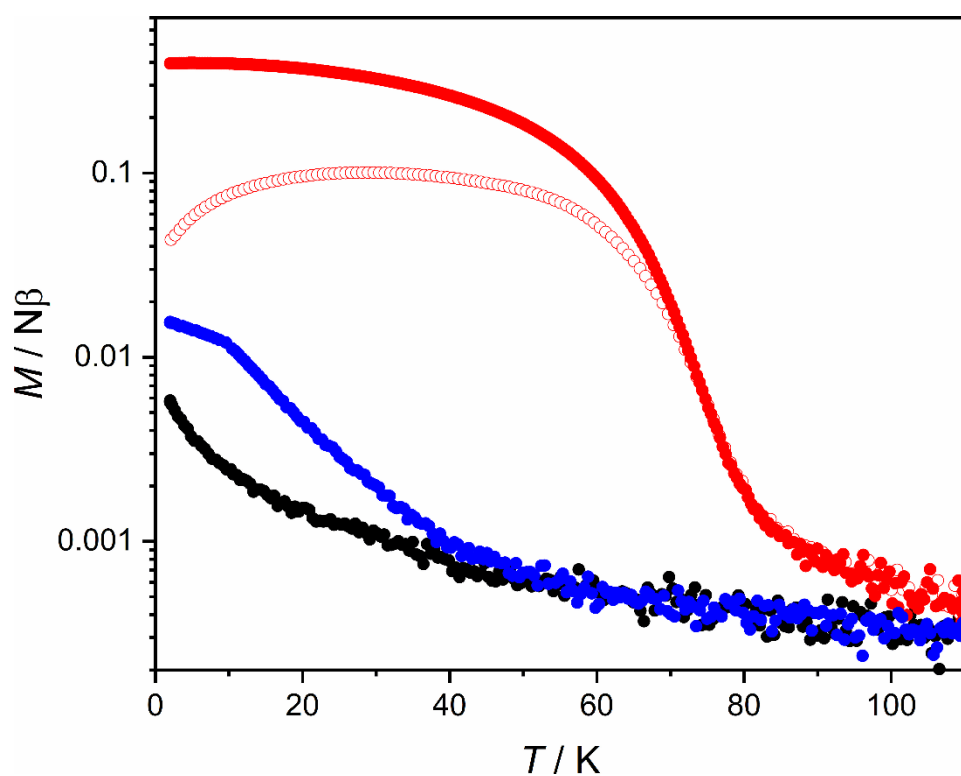

**Figure S34.** Field-cooled (closed symbols) and zero field-cooled (open symbols) curves for **1Mn** before irradiation (black), after 405 nm irradiation at 10 K (red) and after 1 hour of thermal relaxation at 315 K (blue);  $H_{DC} = 0.02$  T.

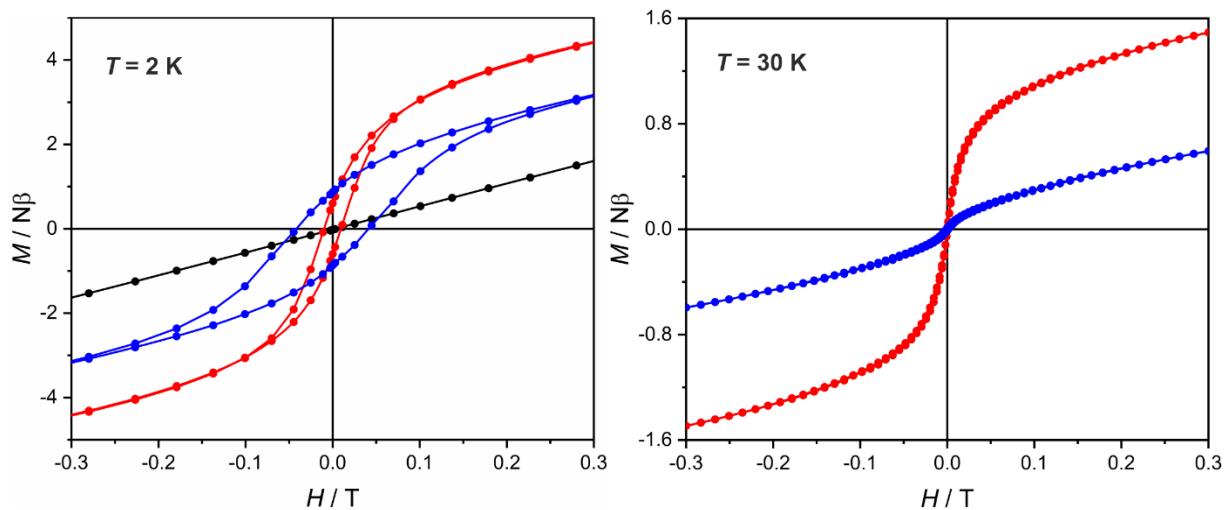

**Figure S35.**  $M(H)$  curves for  $1\text{Mn}\cdot 8\text{H}_2\text{O}$  before irradiation (black), after 405 nm irradiation at 10 K (red), and after 2 hours of thermal relaxation at 240 K (blue). Solid lines are guides for an eye.

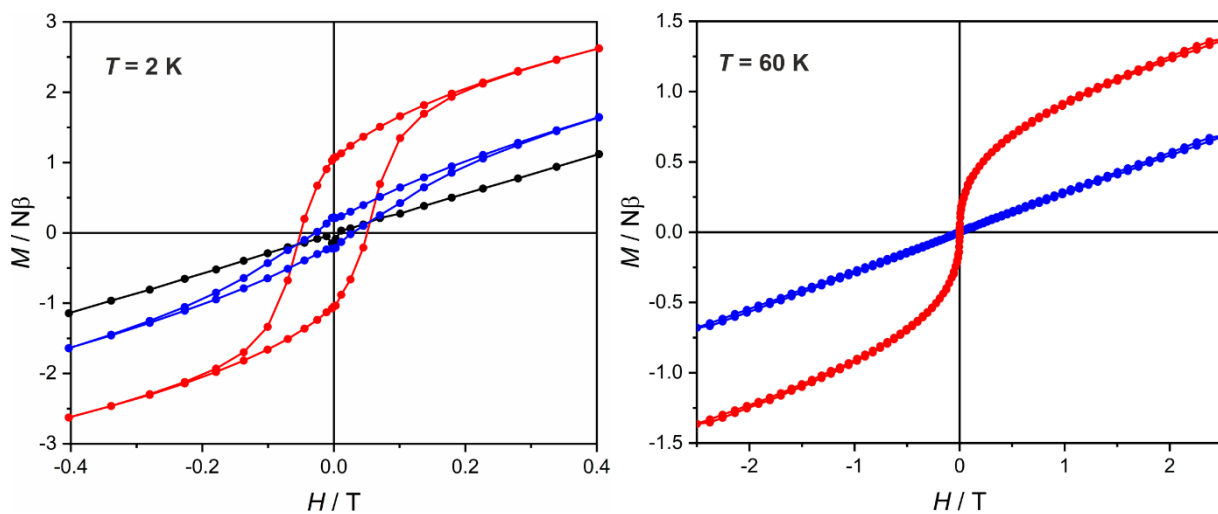

**Figure S36.**  $M(H)$  curves for  $1\text{Mn}$  before irradiation (black), after 405 nm irradiation at 10 K (red), and after 1 hour of thermal relaxation at 315 K (blue). Solid lines are guides for an eye.

**Table S1.** Crystallographic data obtained from SCXRD for **1Mn·8H<sub>2</sub>O** and **2Cd·8H<sub>2</sub>O**.

|                                                 | <b>1Mn·8H<sub>2</sub>O</b>                                                       | <b>2Cd·8H<sub>2</sub>O</b>                                                       |
|-------------------------------------------------|----------------------------------------------------------------------------------|----------------------------------------------------------------------------------|
| <b>CCDC deposition number</b>                   | <b>2046137</b>                                                                   | <b>2046138</b>                                                                   |
| Formula                                         | C <sub>14</sub> H <sub>16</sub> Mn <sub>2</sub> MoN <sub>12</sub> O <sub>8</sub> | C <sub>14</sub> H <sub>20</sub> Cd <sub>2</sub> MoN <sub>12</sub> O <sub>8</sub> |
| FW / g mol <sup>-1</sup>                        | 686.21                                                                           | 805.16                                                                           |
| Temperature / K                                 | 295(2)                                                                           | 100(2)                                                                           |
| Crystal system                                  | monoclinic                                                                       | monoclinic                                                                       |
| Space group                                     | <i>C2/c</i>                                                                      | <i>C2/c</i>                                                                      |
| a / Å                                           | 15.649(2)                                                                        | 15.8209(11)                                                                      |
| b / Å                                           | 14.575(2)                                                                        | 14.7258(9)                                                                       |
| c / Å                                           | 12.307(2)                                                                        | 12.4024(7)                                                                       |
| β / °                                           | 108.364(6)                                                                       | 108.213(2)                                                                       |
| V / Å <sup>3</sup>                              | 2663.9(6)                                                                        | 2744.7(3)                                                                        |
| Z                                               | 4                                                                                | 4                                                                                |
| ρ <sub>calc</sub> / g cm <sup>3</sup>           | 1.711                                                                            | 1.948                                                                            |
| Abs. coeff / mm <sup>-1</sup>                   | 1.46                                                                             | 2.04                                                                             |
| F(000)                                          | 1360                                                                             | 1560                                                                             |
| Crystal size / mm                               | 0.47 x 0.08 x 0.08                                                               | 0.24 x 0.05 x 0.03                                                               |
| θ range / °                                     | 2.8–27.2                                                                         | 2.7–27.5                                                                         |
| Reflections collected                           | 9737                                                                             | 15248                                                                            |
| R <sub>int</sub>                                | 0.046                                                                            | 0.041                                                                            |
| Parameters/restraints                           | 199/9                                                                            | 205/27                                                                           |
| GOF on F <sup>2</sup>                           | 1.05                                                                             | 1.06                                                                             |
| R <sub>1</sub> (refl. with I > 2σ(I))           | 0.042                                                                            | 0.036                                                                            |
| wR <sub>2</sub> (all reflections)               | 0.101                                                                            | 0.083                                                                            |
| Largest diff. peak and hole / e Å <sup>-3</sup> | 1.13/-0.89                                                                       | 2.30/-1.88                                                                       |



**Table S2.** Crystallographic data obtained from PXRD for **1Mn**, **1Mn·2H<sub>2</sub>O** and **1Mn·3H<sub>2</sub>O**.

|                                          | <b>1Mn</b>                                                       | <b>1Mn·2H<sub>2</sub>O</b>                                                      | <b>1Mn·3H<sub>2</sub>O</b>                                                      |
|------------------------------------------|------------------------------------------------------------------|---------------------------------------------------------------------------------|---------------------------------------------------------------------------------|
| <b>CCDC deposition number</b>            | <b>2048779</b>                                                   | <b>2048780</b>                                                                  | <b>2048781</b>                                                                  |
| Formula                                  | C <sub>14</sub> H <sub>8</sub> Mn <sub>2</sub> MoN <sub>12</sub> | C <sub>14</sub> H <sub>8</sub> Mn <sub>2</sub> MoN <sub>12</sub> O <sub>2</sub> | C <sub>14</sub> H <sub>8</sub> Mn <sub>2</sub> MoN <sub>12</sub> O <sub>3</sub> |
| FW / g mol <sup>-1</sup>                 | 550.14                                                           | 582.14                                                                          | 598.14                                                                          |
| Temperature / K                          | 293(2)                                                           | 293(2)                                                                          | 293(2)                                                                          |
| Crystal system                           | triclinic                                                        | monoclinic                                                                      | triclinic                                                                       |
| Space group                              | <i>P</i> $\bar{1}$                                               | <i>C</i> 2/ <i>c</i>                                                            | <i>P</i> $\bar{1}$                                                              |
| a / Å                                    | 9.8543(5)                                                        | 16.4048(6)                                                                      | 10.4152(6)                                                                      |
| b / Å                                    | 10.0005(5)                                                       | 12.9596(6)                                                                      | 10.4382(6)                                                                      |
| c / Å                                    | 10.8395(6)                                                       | 12.1716(5)                                                                      | 12.0481(8)                                                                      |
| $\alpha$ / °                             | 95.383(10)                                                       | 90                                                                              | 74.301(4)                                                                       |
| $\beta$ / °                              | 103.956(9)                                                       | 119.340(2)                                                                      | 67.315(3)                                                                       |
| $\gamma$ / °                             | 103.284(6)                                                       | 90                                                                              | 75.015(4)                                                                       |
| V / Å <sup>3</sup>                       | 996.3(1)                                                         | 2255.7(2)                                                                       | 1145.7(1)                                                                       |
| Z                                        | 2                                                                | 4                                                                               | 2                                                                               |
| $\rho_{\text{calc}}$ / g cm <sup>3</sup> | 1.834                                                            | 1.714                                                                           | 1.734                                                                           |
| Abs. coeff / mm <sup>-1</sup>            | 15.486                                                           | 13.787                                                                          | 13.625                                                                          |
| <i>F</i> (000)                           | 536                                                              | 1136                                                                            | 584                                                                             |
| 2 $\theta$ range / °                     | 6.98-40.03                                                       | 7.01-40.00                                                                      | 7.01-40.00                                                                      |
| <i>GOF</i>                               | 0.41                                                             | 0.78                                                                            | 0.57                                                                            |
| <i>R<sub>p</sub></i>                     | 0.0455                                                           | 0.0875                                                                          | 0.0769                                                                          |
| <i>R<sub>wp</sub></i>                    | 0.0519                                                           | 0.0976                                                                          | 0.0837                                                                          |

**Table S3.** Water adsorption isotherm data recorded for **1Mn** and data obtained by interpolation of water adsorption isotherm recorded at 313 K to water loadings corresponding to the experimental points at 298 K.

| $p_{298K} / \text{kPa}$ | $m/m_0 (298 \text{ K}) / \%$ | $p_{313K} / \text{kPa}$ | $m/m_0 (313 \text{ K}) / \%$ | $p_{313K} / \text{kPa}$<br>[313 K data interpolated to $m/m_0$<br>(298 K)] |
|-------------------------|------------------------------|-------------------------|------------------------------|----------------------------------------------------------------------------|
| 0.14736                 | 1.50612                      | 0.44568                 | 0.45834                      | 0.51268                                                                    |
| 0.20719                 | 3.40586                      | 0.58098                 | 2.57418                      | 0.66000                                                                    |
| 0.26410                 | 4.48121                      | 0.71057                 | 3.93808                      | 0.82056                                                                    |
| 0.32628                 | 5.21663                      | 0.88261                 | 4.78759                      | 1.00725                                                                    |
| 0.38890                 | 5.58731                      | 1.02372                 | 5.27333                      | 1.18633                                                                    |
| 0.45101                 | 6.37377                      | 1.20635                 | 5.62597                      | 1.43031                                                                    |
| 0.51534                 | 8.40742                      | 1.39538                 | 5.97376                      | 1.73200                                                                    |
| 0.5798                  | 9.03000                      | 1.57838                 | 8.06909                      | 1.94358                                                                    |
| 0.64445                 | 15.20212                     | 1.86292                 | 8.69576                      | 2.57883                                                                    |
| 0.70738                 | 18.23667                     | 1.95611                 | 9.08191                      | 2.73031                                                                    |
| 0.77292                 | 21.24157                     | 2.28752                 | 9.63624                      | 3.15300                                                                    |
| 0.84219                 | 21.93095                     | 2.62215                 | 16.02966                     | 3.46848                                                                    |
| 0.90513                 | 22.28711                     | 2.82341                 | 20.13623                     | 3.66673                                                                    |
| 0.97174                 | 22.62985                     | 3.01007                 | 20.87690                     | 3.90032                                                                    |
| 1.03766                 | 22.90689                     | 3.16946                 | 21.28357                     | 4.08659                                                                    |
| 1.10199                 | 23.07982                     | 3.28978                 | 21.57999                     | 4.23255                                                                    |
| 1.16423                 | 23.23948                     | 3.42980                 | 21.85340                     | 4.39588                                                                    |
| 1.22951                 | 23.37729                     | 3.55193                 | 22.09831                     | 4.52287                                                                    |
| 1.29333                 | 23.51214                     | 3.69875                 | 22.33977                     | 4.68102                                                                    |
| 1.35424                 | 23.63372                     | 3.87106                 | 22.58327                     | 4.83306                                                                    |
| 1.41756                 | 23.74984                     | 4.02692                 | 22.83146                     | 4.96766                                                                    |
| 1.48303                 | 23.85941                     | 4.19601                 | 23.04521                     | 5.10449                                                                    |
| 1.54495                 | 23.95836                     | 4.36315                 | 23.20352                     | 5.24357                                                                    |
| 1.60554                 | 24.05793                     | 4.51578                 | 23.37123                     | 5.33887                                                                    |
| 1.67038                 | 24.16001                     | 4.66861                 | 23.50214                     | 5.55476                                                                    |
| 1.73287                 | 24.24600                     | 4.77779                 | 23.59014                     | 5.73369                                                                    |
| 1.79720                 | 24.34308                     | 4.92614                 | 23.70711                     | 5.88037                                                                    |
| 1.86141                 | 24.43298                     | 5.01409                 | 23.79762                     | 5.97378                                                                    |
| 1.92225                 | 24.52163                     | 5.14171                 | 23.88484                     | 6.09734                                                                    |
| 1.98677                 | 24.59951                     | 5.25800                 | 23.96878                     | 6.19786                                                                    |
| 2.05402                 | 24.67630                     | 5.33952                 | 24.05866                     | 6.26125                                                                    |
| 2.11727                 | 24.78524                     | 5.51755                 | 24.14212                     | 6.34426                                                                    |
| 2.18407                 | 24.94272                     | 5.74398                 | 24.25095                     | 6.47738                                                                    |
| 2.24486                 | 25.03200                     | 5.88015                 | 24.34287                     | 6.55459                                                                    |
| 2.3102                  | 25.11144                     | 6.02252                 | 24.47989                     | 6.63650                                                                    |
| 2.37212                 | 25.18261                     | 6.16452                 | 24.55912                     | 6.71901                                                                    |
| 2.43487                 | 25.24348                     | 6.26288                 | 24.67829                     | 6.7878                                                                     |
| 2.49514                 | 25.28624                     | 6.32716                 | 24.75846                     | 6.83516                                                                    |
| 2.5596                  | 25.31683                     | 6.39186                 | 24.85977                     | 6.86741                                                                    |
| 2.62368                 | 25.37161                     | 6.49874                 | 24.96344                     | 6.93612                                                                    |
| 2.69346                 | 25.41797                     | 6.57591                 | 25.05817                     | 7.01038                                                                    |
| 2.75551                 | 25.46354                     | 6.65179                 | 25.12488                     | 7.08340                                                                    |
| 2.81762                 | 25.51754                     | 6.74169                 | 25.20208                     | 7.16992                                                                    |
| 2.87454                 | 25.57076                     | 6.83030                 | 25.28163                     | 7.25519                                                                    |
| 2.94026                 | 25.61509                     | 6.90409                 | 25.35162                     | 7.32620                                                                    |
| 2.99959                 | 25.67627                     | 7.00595                 | 25.41520                     | 7.42422                                                                    |
